# Supplementary material for: Long non-coding RNA polymorphisms on 8q24 are associated with the prognosis of gastric cancer in a Chinese population
Source: PeerJ. 2020 Feb 21;8:e8600. doi: 10.7717/peerj.8600 (PMC7039120; doi:10.7717/peerj.8600)
Supplement: Supplemental Information 1 [file peerj-08-8600-s001.xls]

## Sheet: raw data
StorageNumber	PathologicalNumber	SampleNumber	gender	age	tumorSizeGroup	HistologicalGrade	LymphvascularInvasion	NeuralInvasion	Tstage	Nstage	TNMstage	drinking	smoking	FamilyHistory	Chemotherapy	tumorsizecm	SurvivalTime	DateOfOperation	DateOfDeath	Outcome	rs10087719	rs1026411	rs12682421	rs13252298	rs1562430	rs4871789	rs6983267	rs7816475	STATUS	agegroup	HP	HistologicalType
W2291	385290A	14	1	67	2	2	1	1	3	3	3	1	1	0	0	5cm*4.5cm*1cm	0.985626	2011-11-10	2011-12-10	death	AG	G	A	AG	T	GA	GT	GA	1	2		3
W0917	319417A	227	2	75	1	1	1	1	3	0	2	0	0	0	0	3*2.5*1	1.21561	2010-02-10	2010-03-19	death	A	A	A	AG	T	GA	GT	G	1	2	0	1
W2443	393729A	20	1	72	2	2	1	1	3	1	2	0	0	0	0	7cm*3.7cm*1.8cm	1.41273	2012-01-17	2012-02-29	death	AG	GA	A	AG	T	GA	GT	GA	1	2		1
W2579	394262A	798	2	56	1	2	0	0			3	0	0	0	0		1.47844	2012-03-15	2012-04-29	death	AG	GA	A	AG	T	GA	GT	G	1	1		1
W2297	385432A	542	1	71	1	2	0	0	1	0	1	0	1	0	0	3.5cm*2cm*0.8cm	1.577	2011-11-11	2011-12-29	death	A	G	A	AG	CT	A	G	G	1	2	1	2
W2290	385192A	538	2	49	1	2	1	0	3	0	2	0	0	0	0	4cm*2.5cm*0.8cm	1.70842	2011-11-09	2011-12-31	death	A	GA	A	AG	T	G	GT	G	1	1	1	2
W2553	401260A	581	2	59	2	1	0	0	3	2	3	0	0	0	0	5.2cm*4.8cm*0.8cm	1.80698	2012-03-06	2012-04-30	death	A	GA	GA	AG	T	GA	GT	9	1	1	1	1
W0545	299321	142	1	75	2	2	1	1	3	3	3	0	1	0	0	8*4*0.7	1.83984	2009-06-19	2009-08-14	death	A	G	A	A	T	GA	GT	G	1	2	1	1
W2270	384990A	534	2	60	1	1	1	1	1	0	1	0	0	0	0	0.8cm*0.4cm	1.90554	2011-11-03	2011-12-31	death	A	G	GA	AG	T	G	GT	G	1	2	1	1
W3174	421922A	41	1	72	2	2	1	1	4	3	3	0	1	0	0	8cm*6cm*1.6cm	2.13552	2012-09-26	2012-11-30	death	A	A	GA	AG	CT	GA	GT	G	1	2		2
W2758	410731A	619	1	73	1	2	1	1	3	3	3	0	0	0	0	4cm*3cm*1cm	2.29979	2012-05-22	2012-07-31	death	A	G	A	G	T	G	T	G	1	2	1	1
W1613	355950A	402	2	77	1	1	1	1	4	2	3	0	0	0	0	4.5*3*0.6	2.46407	2011-02-28	2011-05-14	death	A	A	A	AG	T	GA	GT	G	1	2	0	1
W0885	318056A	218	1	53	1	2	1	1	3	3	3	1	1	0	0	4*3*2	2.49692	2010-01-25	2010-04-11	death	A	GA	A	AG	T	G	T	G	1	1	1	1
W0247	284906	84	1	66	2	2	0	0	3	2	3	0	0	0	0	8*7*2	2.69405	2009-01-05	2009-03-28	death	AG	A	GA	A	T	G	T	G	1	2	1	3
W1428	346334A	365	1	70	1	2	1	1	4	2	3	1	1	1	0	4.5×4×1	2.89117	2010-11-18	2011-02-14	death	A	GA	GA	AG	T	A	G	G	1	2	1	1
W0124	280198	73	1	64	1	1	1	1	3	0	2	0	1	0	0	3.5*3.5*1	3.02259	2008-10-31	2009-01-31	death	A	A	A	AG	T	G	T	G	1	2	1	1
W1414	345766A	359	1	74	2	2	1	1	3	3	3	0	1	0	0	7.5×7×1.5	3.12115	2010-11-12	2011-02-15	death	A	GA	A	AG	T	G	T	G	1	2	1	1
W1172	333516A	294	1	63	2	2	1	1	3	3	3	0	0	0	0	7x3x0.5	3.18686	2010-07-12	2010-10-17	death	A	GA	A	G	T	GA	GT	G	1	2	1	1
W0796	312241	208	1	56	2	2	1	1	3	1	2	1	1	1	0	5.5*3*1	3.18686	2009-11-19	2010-02-24	death	A	GA	A	A	T	G	T	G	1	1	1	1
W0028	276535	57	1	48	2	2	1	0	3	1	2	1	1	0	1	10*6*1.5	3.21971	2008-08-29	2008-12-05	death	A	A	A	G	T	GA	GT	G	1	1	1	1
W0128	280552	74	1	72	2	1	1	0	3	1	2	1	1	0	0	5.5*3*1	3.31828	2008-11-05	2009-02-14	death	A	GA	A	G	CT	A	G	G	1	2	1	1
W1595	354722A	756	1	55	1	2	1	1	3	2	3	0	0	0	1	4*4*1.3	3.41684	2011-02-16	2011-05-31	death	AG	GA	GA	A	T	GA	GT	GA	1	1		1
W0875	316787A	215	1	54	1	1	1	1	4	3	3	1	1	0	0	3.5*3*1	3.74538	2010-01-12	2010-05-06	death	G	GA	A	A	T	G	T	GA	1	1	0	1
W2707	407370A	605	1	62	2	2	1	1	3	3	3	0	0	0	0	8cm*5cm*1.5cm	4.10678	2012-04-28	2012-08-31	death	AG	GA	A	AG	CT	A	9	GA	1	2	0	3
W1346	342492A	336	2	69	1	2	1	1	3	3	3	1	1	0	0	4×3.5×1.5	4.17248	2010-10-11	2011-02-15	death	AG	GA	A	AG	CT	G	T	GA	1	2	1	1
W2867	412863A	630	1	41	2	2	1	1	4	3	3	1	1	0	0	7cm*4cm*1.2cm	4.40246	2012-06-19	2012-10-31	death	A	A	G	A	T	A	9	G	1	1	0	1
W3954	456684A	405	1	82	2	2	1	0	3	2	3	0	0	0	0	11*9*2.5	4.46817	2013-09-17	2014-01-31	death	A	GA	A	A	T	GA	GT	G	1	2	0	3
W2438	395944A	562	1	59	2	2	1	0	4	3	3	1	0	0	1	10cm*8cm*1.3cm	4.59959	2012-02-10	2012-06-29	death	A	G	A	AG	T	G	GT	G	1	1	1	1
W0524	298539	134	1	51	1	2	1	1	4	2	3	0	1	0	0	22*16*1.2	4.6653	2009-06-11	2009-10-31	death	A	G	A	AG	T	GA	G	G	1	1	1	1
W2809	411527A	24	1	69	1	2	1	1	4	3	3	0	0	0	0	4cm*3.8cm*1.1cm	4.96099	2012-06-06	2012-11-04	death	A	GA	A	AG	T	G	T	G	1	2		1
W1923	369396A	460	1	72	1	2	1	0	3	2	3	1	0	0	0	3cm*2.5cm*1.5cm	5.0924	2011-06-17	2011-11-19	death	AG	GA	A	AG	T	GA	GT	GA	1	2	1	1
W3525	434692A	723	1	78	1	2	1	1	4	3	3	0	0	0	0	3*3*0.8	5.12526	2013-02-25	2013-07-31	death	A	GA	A	A	T	A	9	G	1	2	0	3
W3086	419053A	33	1	64	2	2	0	0	3	0	2	0	0	0	0	6.5cm*5cm*1.5cm	5.15811	2012-08-27	2013-01-31	death	AG	G	GA	A	T	GA	GT	G	1	2		1
W0372	290624	100	1	71	1	2	1	1	3	3	3	0	0	0	0	4*2*1	5.25667	2009-03-18	2009-08-25	death	A	A	GA	AG	T	G	T	G	1	2	1	1
W0617	302901	157	1	82	1	1	1	1	3	1	2	0	0	0	0	4*3*0.3	5.32238	2009-07-27	2010-01-05	death	A	GA	A	AG	T	G	T	G	1	2	1	3
W2922	414561A	641	1	64	1	2	1	1	3	0	2	0	0	0	1		5.42094	2012-07-06	2012-12-18	death	A	GA	A	AG	T	G	GT	G	1	2	0	3
W1920	369612A	458	2	81	2	2	1	1	3	2	3	1	0	0	0	8cm*7.5cm*2.5cm	5.55236	2011-06-22	2011-12-08	death	A	GA	GA	A	T	GA	G	G	1	2	1	1
W0886	318057A	219	2	55	2	2	1	1	3	3	3	0	0	0	0	5*4*1.5	5.58522	2010-01-25	2010-07-14	death	A	G	A	G	CT	G	T	G	1	1	1	1
W0013	275824	54	1	72	2	2	1	1	3	3	3	0	0	0	0	5*4*0.8	5.61807	2008-08-26	2009-02-13	death	A	G	A	AG	CT	GA	GT	G	1	2	0	2
W1959	370418A	771	1	66	2	2	1	1	3	3	3	1	1	0	1	15*13*3	5.68378	2011-06-29	2011-12-19	death	A	A	A	AG	T	GA	GT	G	1	2		2
W0794	312032	206	1	36	2	2	1	1	3	3	3	1	1	0	1	9.9*8*1.5	5.8809	2009-11-16	2010-05-14	death	A	GA	GA	AG	T	G	T	G	1	1	1	3
W1875	366856A	760	2	46	2	2	1	1	3	3	3	0	0	0	0	11cm*6cm*1.0cm	5.91376	2011-05-30	2011-11-26	lost to follow-up	AG	GA	GA	A	CT	GA	GT	GA	0	1		3
W0024	276216	56	1	78	2	2	1	1	3	2	3	0	0	0	0	6*5*2	5.91376	2008-09-01	2009-02-28	death	AG	GA	A	AG	T	G	T	GA	1	2	1	1
W3166	421611A	40	1	62	1	1	1	0	3	1	2	1	1	0	0	4cm*3cm*0.8cm	5.94661	2012-09-24	2013-03-24	lost to follow-up	A	GA	GA	AG	T	G	GT	G	0	2		1
W0845	315127A	212	1	58	1	2	1	1	3	2	3	1	0	0	1	2*1.5*0.8	5.94661	2009-12-18	2010-06-17	death	A	GA	A	AG	T	G	T	G	1	1	1	1
W2237	382423A	778	1	46	1	2	1	1	3	3	3	0	0	0	0	3.5cm*2.8cm*0.8cm	6.01232	2011-10-18	2012-04-18	lost to follow-up	AG	A	GA	AG	T	GA	T	G	0	1		1
W3246	424135A	680	1	44	2	2	1	1	4	3	3	0	0	0	0	7.5cm*6.5cm*1.0cm	6.01232	2012-10-25	2013-04-26	death	AG	G	A	A	T	G	GT	GA	1	1	1	1
W2221	381684A	776	1	46	1	2	1	1	3	2	3	1	1	0	1	2.5cm*1.3cm*0.5cm	6.04517	2011-10-12	2012-04-13	lost to follow-up	A	G	A	AG	T	G	GT	G	0	1		1
W2904	414025A	637	1	58	2	2	1	1	4	3	3	0	0	0	0	6cm*5.8cm*1cm	6.04517	2012-07-03	2013-01-03	death	A	G	A	AG	CT	G	T	G	1	1	0	1
W0883	317151A	217	1	70	2	1	1	1	3	1	2	0	1	0	0	6.5*4*2	6.11088	2010-01-15	2010-07-20	death	A	A	A	AG	T	GA	GT	G	1	2	1	1
W4178	465834A	273	1	48	2	2	1	1	3	1	2	0	0	0	0	5*4*3	6.17659	2013-12-12	2014-06-18	death	A	GA	GA	A	T	GA	GT	G	1	1	1	1
W2313	386988A	544	2	72	2	2	1	1	4	2	3	0	0	0	0	5cm*4cm*1.8cm	6.2423	2011-11-23	2012-05-31	death	AG	GA	A	AG	T	G	9	GA	1	2	1	3
W2412	392247A	558	1	76	2	2	1	1	3	3	3	0	0	0	0	5.5cm*4.5cm*1.8cm	6.27515	2012-01-05	2012-07-14	death	AG	G	GA	AG	T	G	GT	G	1	2	1	1
W2228	382539A	524	1	81	2	2	1	1	4	3	3	0	0	0	0	9cm*8cm*1.2cm	6.37372	2011-10-19	2012-04-30	death	A	G	GA	AG	T	G	GT	G	1	2	0	3
W0565	300548	148	1	73	1	2	1	1	3	1	2	0	0	0	0	3.6*3.5*0.6	6.43943	2009-07-02	2010-01-14	death	AG	GA	A	AG	T	G	T	G	1	2	1	3
W0901	318543A	223	1	43	2	2	1	1	3	2	3	1	0	0	0	8*5*1.5	6.47228	2010-01-29	2010-08-14	death	A	GA	GA	A	CT	GA	GT	G	1	1	1	1
W1316	341048A	332	1	60	1	2	0	1	3	1	2	0	0	0	0	2.2×1.5×0.9	6.47228	2010-09-20	2011-04-05	death	AG	G	A	A	T	G	T	G	1	2	0	2
W2424	393453A	560	2	58	2	2	1	1	4	3	3	0	0	0	1	9cm*6cm*1cm	6.57084	2012-01-13	2012-07-31	death	A	A	A	A	T	G	GT	G	1	1	1	3
W1582	354089A	394	1	50	2	2	1	1	3	1	2	0	1	0	1	9*8*2	6.57084	2011-02-12	2011-08-31	death	A	GA	A	AG	CT	GA	GT	G	1	1	0	1
W0079	278060	66	2	81	2	1	1	0	3	2	3	0	0	0	0	9*6*6	6.57084	2008-09-26	2009-04-14	death	A	GA	A	AG	T	G	T	G	1	2	0	1
W0045	276925	60	1	45	1	2	1	1	3	2	3	0	0	1	1	4*3.5*1	6.6694	2008-09-09	2009-03-31	death	A	GA	GA	AG	T	A	G	G	1	1	0	2
W1049	327519A	253	1	68	2	2	1	1	3	2	3	0	0	0	0	6*5*1.5	6.89938	2010-05-11	2010-12-07	death	A	G	A	G	T	GA	GT	G	1	2	1	1
W0048	277062	62	1	40	2	2	0	0	3	1	2	1	1	0	1	6*4*1	7.0308	2008-09-10	2009-04-12	death	A	GA	A	A	T	A	G	G	1	1	1	2
W0140	281235	75	1	70	1	2	1	0	1	0	1	1	1	0	0	2*1.8*0.5	7.09651	2008-11-11	2009-06-15	lost to follow-up	AG	G	A	A	T	G	T	G	0	2	1	3
W3747	447229A	515	1	62	1	2	1	1	3	3	3	0	0	0	1	4.5*3.7*0.8	7.22793	2013-06-25	2014-01-31	death	AG	GA	GA	A	T	GA	GT	GA	1	2	1	1
W0346	289724	95	1	69	2	2	1	0	3	2	3	0	0	0	0	11*8*2	7.26078	2009-03-09	2009-10-16	death	A	GA	A	A	T	A	G	G	1	2	0	1
W3163	421550A	39	1	65	2	1	1	1	4		3	0	0	0	1	8cm*4.5cm*2cm	7.26078	2012-09-21	2013-04-30	death	A	A	A	AG	T	G	T	G	1	2		3
W2507	398511A	570	2	63	2	2	1	0	4	0	3	0	1	0	1	10.5cm*8cm*1.8cm	7.29363	2012-02-21	2012-09-30	death	A	GA	GA	A	T	GA	GT	9	1	2	0	1
W3513	434129A	721	1	77	2	2	1	1	3	3	3	0	0	0	0	10*6*1.5	7.32649	2013-02-19	2013-09-30	death	A	GA	A	A	T	GA	GT	G	1	2	0	1
W3062	418486A	661	1	61	2	2	1	1	4	3	3	1	1	0	0	8cm*6cm*2cm	7.32649	2012-08-20	2013-03-31	death	AG	G	A	AG	T	G	T	GA	1	2	1	1
W1054	327802A	256	2	43	2	2	1	1	3	3	3	0	0	0	0	8*5*1	7.49076	2010-05-11	2010-12-25	death	A	GA	GA	A	T	GA	GT	G	1	1	1	1
W0338	293097	94	1	65	2	1	0	1	3	1	2	1	0	0	1	8*7*1	7.55647	2009-03-14	2009-10-30	death	AG	GA	A	AG	CT	G	T	G	1	2	1	1
W0534	299122	137	1	68	2	1	0	1	3	2	3	0	0	0	1	6*3*1.4	7.62218	2009-06-17	2010-02-04	death	A	GA	GA	AG	T	G	T	G	1	2	0	1
W2192	381281A	518	2	59	2	2	1	1	3	3	3	0	0	0	1	5.5cm*5cm*1cm	7.72074	2011-10-09	2012-05-31	death	A	GA	G	AG	T	G	GT	G	1	1	0	1
W1976	371265A	772	2	61	2	2	1	1	3	3	3	0	0	0	0	7cm*5cm*2cm	7.78645	2011-07-06	2012-02-28	death	A	GA	GA	A	T	GA	GT	G	1	2		1
W0716	307512	186	1	62	1	1	1	1	3	3	3	1	0	1	1	2.5*2*1	7.78645	2009-09-16	2010-05-11	death	A	G	A	A	CT	G	T	G	1	2	0	1
W0692	306437	182	2	61	2	2	1	1	3	2	3	0	1	0	1	5*3*1.5	7.78645	2009-09-02	2010-04-27	death	A	GA	A	AG	T	A	G	G	1	2	0	3
W0544	299124	141	1	51	1	2	1	0	2	3	3	0	0	0	1	1	7.88501	2009-06-20	2010-02-15	death	A	GA	A	G	CT	G	T	G	1	1	1	1
W1292	339611A	327	1	66	1	2	1	1	3	2	3	0	0	0	0	4.5×3.5×1.5	7.91786	2010-09-07	2011-05-06	death	A	GA	A	AG	T	A	GT	G	1	2	1	1
W1347	342493A	337	1	81	1	2	1	0	3	3	3	0	0	1	0	4.5×3×1	8.14784	2010-10-11	2011-06-16	death	AG	GA	A	A	CT	9	GT	9	1	2		1
W0774	311351	201	2	76	2	2	1	1	3	1	2	0	0	1	0	5*4.5*1.8	8.14784	2009-11-11	2010-07-17	death	AG	G	A	AG	CT	G	T	GA	1	2	1	3
W0641	304030	166	1	59	2	2	1	1	3	2	3	1	1	0	0	5.5*3*1.5	8.21355	2009-08-07	2010-04-14	death	AG	9	A	A	T	A	G	G	1	1	0	1
W2312	386493A	783	1	60	2	2	1	0	4	3	3	0	0	0	1	9.5cm*8cm*1.8cm	8.24641	2011-11-18	2012-07-26	death	A	GA	GA	AG	T	A	GT	G	1	2		2
W3975	456878A	390	1	69	2	2	1	1	4	2	3	0	0	0	0	15*3*1.5	8.31211	2013-09-18	2014-05-29	death	A	GA	A	A	T	GA	GT	G	1	2	1	2
W3025	417547A	658	1	68	1	2	0	1	3	0	2	0	1	0	0	4.5cm*3cm*1.4cm	8.67351	2012-08-09	2013-04-30	death	AG	GA	A	G	CT	GA	GT	G	1	2	1	1
W2287	385103A	781	1	59	1	2	0	0	1	3	2	0	0	0	0	3cm*2cm*0.6cm	8.70637	2011-11-09	2012-07-31	death	A	GA	GA	A	CT	GA	GT	G	1	1		1
W0614	302378	155	1	66	1	1	1	1	3	3	3	1	1	0	1	3*2*0.9	8.77207	2009-07-21	2010-04-14	death	A	GA	A	A	CT	G	T	G	1	2	1	1
W2907	414124A	639	2	52	2	2	1	1	3	3	3	0	0	0	0	6cm*4cm*1.5cm	8.87064	2012-07-04	2013-03-31	death	A	G	A	G	T	GA	GT	G	1	1	0	1
W1407	346336A	355	1	85	2	2	1	1	3	3	3	0	0	0	0	8×6×0.8	8.93634	2010-11-18	2011-08-17	death	AG	A	A	AG	CT	GA	GT	GA	1	2	0	1
W4035	461295A	339	1	74	1	2	0	0	1	0	1	0	0	0	0	0.8*0.8*0.1	9.03491	2013-10-17	2014-07-19	death	A	G	A	AG	CT	GA	GT	G	1	2	1	1
W2899	414042A	635	2	49	2	2	1	1	3	2	3	0	0	0	0	6cm*3cm*2cm	9.03491	2012-06-29	2013-03-31	death	AG	G	A	A	T	GA	GT	GA	1	1	0	1
W0520	298646	132	1	66	1	2	1	1	3	3	3	0	0	0	1	3.5*2.5*1.5	9.16632	2009-06-12	2010-03-18	death	A	GA	A	AG	CT	GA	GT	G	1	2	0	1
W1439	346994A	367	2	63	2	2	1	1	3	1	2	0	0	0	0	5.5×4.5×1.5	9.16632	2010-11-25	2011-08-31	death	AG	G	A	A	T	GA	GT	G	1	2		3
W0671	304770	175	1	87	2	2	1	1	3	3	3	1	0	0	0	6*6*1.5	9.26489	2009-08-17	2010-05-26	death	A	A	G	A	T	G	T	G	1	2	0	1
W2316	386435A	545	1	56	1	2	1	1	4	3	3	0	0	0	0	2.8cm*2.5cm*2cm	9.42916	2011-11-18	2012-08-31	death	A	A	GA	A	T	GA	GT	G	1	1	1	1
W0661	304297	173	2	55	2	2	1	1	3	3	3	0	0	0	1	胃壁弥漫性增厚	9.46201	2009-08-08	2010-05-23	death	A	A	A	A	T	GA	GT	G	1	1	1	1
W1320	341324A	333	1	52	1	1	1	0	3	3	3	1	1	0	1	4.5×4×0.9	9.52772	2010-09-25	2011-07-12	death	AG	G	A	A	T	G	T	GA	1	1	1	1
W0635	303667	164	1	66	1	1	0	0	2	0	1	1	1	1	0	3.5*2.2*1.5	9.56057	2009-08-04	2010-05-22	death	A	G	GA	A	T	G	G	G	1	2	1	1
W2278	385713A	535	1	54	2	2	1	1	3	3	3	0	0	0	0	5.5cm*3.7cm*1.5cm	9.56057	2011-11-14	2012-08-31	death	A	GA	A	AG	T	GA	GT	G	1	1	0	2
W3235	423777A	678	2	64	1	2	1	1	4	3	3	0	0	0	1	4*3*0.3	9.62628	2012-10-22	2013-08-11	death	A	A	A	AG	CT	A	GT	G	1	2	1	3
W3549	436585A	726	1	64	2	2	1	1	4	3	3	1	0	1	1	7*6*1.5	9.79055	2013-03-08	2013-12-31	death	A	GA	A	A	C	G	9	G	1	2	1	1
W4090	461100A	48	1	65	1	2	1	1	3	3	3	1	1	0	1	4*3.5*1.5	9.95483	2013-11-01	2014-08-31	death	A	A	GA	A	T	GA	GT	G	1	2		1
W4082	461106A	308	1	46	1	2	1	1	3	3	3	1	1	0	0	4.5*3*1.5	9.95483	2013-11-01	2014-08-31	death	AG	G	A	G	T	G	T	GA	1	1	1	1
W0647	303793	168	2	52	2	2	1	0	3	1	2	0	0	0	1	5.5*2.5*1	10.0534	2009-08-05	2010-06-07	death	A	G	A	AG	T	GA	GT	G	1	1	1	1
W2129	377004A	501	1	56	1	2	1	1	4	3	3	1	1	0	1	2.5cm*2cm*1.5cm	10.1848	2011-08-25	2012-06-30	death	A	A	GA	AG	T	G	GT	G	1	1	0	1
W1222	336657A	309	1	63	2	1	1	0	3	2	3	0	1	1	1	8×5×1.8	10.2177	2010-08-09	2011-06-16	death	A	GA	A	AG	T	A	G	G	1	2	1	1
W3408	429992A	707	1	71	2	2	1	1	4	3	3	0	0	0	1	5.5*4.5*0.8	10.3162	2012-12-28	2013-11-07	death	A	GA	A	A	CT	A	9	G	1	2	1	1
W2268	384180A	13	1	73	2	2	1	1	4	3	3	0	1	0	0	6.2cm*5.8cm*0.7cm	10.3162	2011-11-02	2012-09-11	death	A	GA	A	AG	T	GA	GT	G	1	2		1
W0011	275489	53	1	59	2	1	1	0	2	3	3	1	0	1	1	7*5*0.8	10.3491	2008-08-19	2009-06-30	death	A	GA	GA	AG	T	GA	GT	G	1	1	0	1
W1277	339353A	325	1	70	1	1	1	1	3	2	3	0	0	0	0	3.5×3.2×1.5	10.3819	2010-09-01	2011-07-14	death	A	GA	GA	AG	CT	GA	GT	G	1	2	1	1
W1710	359255A	416	1	66	2	2	1	0	3	0	2	0	1	0	1	10.5cm*7cm*2cm	10.3819	2011-03-25	2012-02-04	death	AG	GA	A	A	T	GA	G	GA	1	2	1	1
W0651	304282	169	2	70	2	2	1	1	4	3	3	0	0	0	0	6*3*0.6	10.4476	2009-08-11	2010-06-25	death	A	A	GA	AG	T	A	G	G	1	2	1	1
W1921	369161A	459	2	48	2	2	1	1	3	3	3	0	0	0	0	5cm*4.5cm*1.5cm	10.4805	2011-06-16	2012-04-30	death	A	GA	A	AG	T	GA	9	G	1	1	1	1
W1573	353474A	392	1	70	2	1	1	0	3	3	3	0	1	0	1	5.5*4*1.5	10.4805	2011-01-28	2011-12-13	death	A	GA	GA	AG	T	GA	GT	G	1	2	1	1
W1466	348306A	372	2	77	2	2	1	1	3	2	3	0	0	0	0	5×4.5×1.2	10.6119	2010-12-08	2011-10-27	death	A	A	A	A	T	G	T	G	1	2	1	1
W1819	364475A	440	1	48	1	2	1	1	3	3	3	1	1	0	1	3.5cm*3cm*1.2cm	10.7105	2011-05-10	2012-03-31	death	A	A	GA	A	T	A	G	G	1	1	1	1
W2157	378588A	509	1	60	1	2	1	1	4	3	3	1	0	0	1	3.5cm*2.5cm*1.8cm	10.7433	2011-09-08	2012-07-31	death	AG	GA	A	AG	CT	G	G	G	1	2	1	3
W1702	358911A	4	1	78	2	2	1	1	3	1	2	0	0	0	0	6.5*6.5*3	10.7762	2011-03-23	2012-02-14	death	A	GA	GA	A	T	G	GT	G	1	2		1
W0113	279700	71	1	68	2	2	1	1	3	2	3	0	0	0	1	6*5*2	11.039	2008-10-24	2009-09-25	death	AG	A	A	G	T	G	T	G	1	2	1	3
W2535	399971A	576	1	74	2	2	1	1	3	3	3	1	0	0	0	8.5cm*5.8cm*1.5cm	11.0719	2012-02-29	2013-01-31	death	AG	GA	GA	AG	CT	GA	GT	GA	1	2	1	1
W2135	377360A	11	1	78	1	1	1	1	3	3	3	0	0	0	0	4cm*3.5cm*1.4cm	11.1376	2011-08-29	2012-08-02	death	A	G	A	AG	T	A	9	G	1	2		1
W3002	416685A	655	1	64	1	2	0	1	3	0	2	1	1	0	0	3cm*2.5cm*1.1cm	11.2361	2012-07-31	2013-07-08	death	A	A	A	A	T	GA	GT	G	1	2	1	2
W0464	295391	117	2	48	2	2	1	0	3	3	3	0	0	0	1	15*12*1	11.3676	2009-05-07	2010-04-18	death	A	G	A	AG	CT	G	T	G	1	1	1	1
W0150	281539	76	1	71	2	2	1	0	3	2	3	1	0	0	1	11*8.5*2.5	11.3676	2008-11-14	2009-10-26	death	A	GA	A	AG	T	G	T	G	1	2	0	1
W3357	428124A	701	1	59	2	2	1	1	4	3	3	0	0	0	1	6cm*6cm*3cm	11.4004	2012-12-07	2013-11-19	death	A	G	A	A	T	GA	GT	G	1	1	0	1
L0360	350506A	743	1	61	2	1	1	1	3	2	3	1	1	0	1	5cm×4cm×1.2cm	11.5647	2010-12-29	2011-12-16	death	AG	GA	A	AG	T	G	9	GA	1	2		1
W1832	364669A	442	1	38	1	2	1	1	3	3	3	1	1	0	1	4cm*3.5cm*1cm	11.6632	2011-05-11	2012-04-30	death	A	GA	A	AG	T	G	T	G	1	1	0	1
W0660	304769	172	1	69	2	1	1	0	3	3	3	0	1	0	1	6*4*2	11.6961	2009-08-17	2010-08-08	death	AG	G	GA	AG	T	A	G	GA	1	2	1	1
W0676	304904	177	1	52	1	2	0	1	2	0	1	0	0	0	1	4.5*4*1.5	11.7947	2009-08-18	2010-08-12	death	A	GA	A	A	T	GA	GT	G	1	1	0	1
W2993	416985A	654	1	54	1	2	1	0	4	1	3	0	1	0	0	4cm*3.2cm*1cm	11.9261	2012-08-02	2013-07-31	death	AG	GA	GA	A	T	GA	GT	G	1	1	1	2
W2662	405983A	594	1	63	2	2	1	1	4	3	3	1	0	0	0	10cm*6cm*1.5cm	12.2218	2012-04-12	2013-04-19	death	A	G	GA	A	T	GA	GT	G	1	2	1	1
W1409	345038A	357	1	58	2	2	1	1	3	3	3	0	0	1	0	5×4×0.7	12.2218	2010-11-05	2011-11-12	death	A	GA	A	G	T	GA	GT	G	1	1	0	1
W1881	366930A	449	1	58	1	2	1	1	3	2	3	0	1	0	0	3.5cm*3.5cm*1.5cm	12.2875	2011-05-30	2012-06-07	death	A	GA	A	A	T	GA	GT	G	1	1	0	1
W2470	396213A	564	2	75	1	2	1	0	4	3	3	0	0	0	0	3.5cm*3.5cm*1cm	12.5175	2012-02-13	2013-02-28	death	A	G	A	AG	T	GA	GT	G	1	2	1	2
W0091	278658	69	1	57	2	2	0	0	3	0	2	1	1	0	1	10*6*1	12.5503	2008-10-08	2009-10-25	death	AG	G	A	A	T	A	G	G	1	1	1	3
W2575	401775A	586	2	62	2	2	1	1	4	3	3				0	5.5cm*3cm*0.8cm	12.5832	2012-03-13	2013-03-31	death	A	GA	A	A	T	G	T	G	1	2	1	1
W3578	437859A	731	2	61	2	2	1	1	4	2	3	0	0	0	0	9*8.7*2	12.616	2013-03-26	2014-04-14	death	A	A	GA	A	T	A	9	G	1	2	1	2
W1897	367678A	453	1	70	2	2	1	1	3	0	2	0	0	0	1	6.5cm*5cm*1.5cm	12.7803	2011-06-07	2012-06-30	death	A	GA	G	A	T	GA	GT	G	1	2	0	1
W1052	327652A	254	2	55	2	2	1	1	3	3	3	0	0	0	0	8*6*1.5	12.846	2010-05-12	2011-06-07	death	A	A	A	AG	T	GA	GT	G	1	1	1	1
W2601	402484A	590	1	60	2	2	0	1	3	3	3	0	0	0	0	5.5cm*5cm*1.5cm	12.9774	2012-03-26	2013-04-25	death	A	G	GA	A	T	GA	GT	G	1	2	1	3
W3597	438582A	737	1	59	1	2	1	1	3	2	3	1	1	0	0	3*2.5*0.8	13.0431	2013-03-29	2014-04-30	death	A	G	A	A	T	G	GT	G	1	1	1	1
W1836	366264A	443	1	50	2	2	1	1	3	3	3	0	0	0	0	6.5cm*5.5cm*1.7cm	13.2402	2011-05-24	2012-06-30	death	A	G	GA	A	T	G	T	G	1	1	1	2
W1698	358912A	414	1	47	1	2	1	1	2	0	1	0	0	0	1	1.5*1.0.5	13.2731	2011-03-23	2012-04-30	death	A	GA	A	A	T	GA	T	G	1	1	1	1
W3639	440786a	742	1	39	1	2	1	1	4	3	3	1	1	0	0	3*2.5*1.5	13.2731	2013-04-22	2014-05-31	death	AG	GA	A	AG	CT	GA	GT	GA	1	1	0	1
W0390	291455	105	1	54	2	2	1	1	3	3	3	1	1	0	1	7*6*1	13.4045	2009-03-26	2010-05-08	death	AG	GA	A	AG	C	A	G	9	1	1	0	1
W2238	382624A	527	1	54	2	2	0	1	3	0	2	1	1	0	0	8cm*5.5cm*0.8cm	13.4374	2011-10-18	2012-11-30	death	AG	A	A	AG	CT	G	T	G	1	1	1	1
W4106	462277A	49	1	57	2	1	1	1	4	3	3	1	1	0	1	8*7.5*5.8	13.6016	2013-11-12	2014-12-31	death	A	GA	A	A	CT	GA	GT	G	1	1		3
W0564	300549	147	1	75	2	2	1	1	3	3	3	1	1	0	0	5*5*0.6	13.6674	2009-07-02	2010-08-22	death	G	A	G	A	CT	GA	GT	GA	1	2	1	1
W0764	310867	197	2	50	1	1	1	1	3	3	3	0	0	1	1	3*2.5*1.2	13.7331	2009-11-02	2010-12-25	death	AG	GA	GA	AG	T	GA	GT	GA	1	1	0	1
W2822	411696A	25	1	48	2	2	0	1	3	3	3	1	1	0	0	7.2cm*3.5cm*1.5cm	13.7659	2012-06-07	2013-07-31	death	A	GA	A	AG	T	GA	GT	G	1	1		3
W2549	400712A	796	1	52	2	2	1	1	4	3	3	0	1	0	1	12cm*10cm*1.5cm	13.8645	2012-03-14	2013-05-10	death	AG	G	A	AG	CT	GA	GT	GA	1	1		3
W2347	388401A	785	1	60	1	1	0	0	1	3	2	0	0	0	1	3.5cm*3cm*1cm	13.8973	2011-12-05	2013-01-31	death	AG	A	A	G	T	G	GT	G	1	2		1
W0846	315105A	213	1	75	1	1	1	0	1	1	1	0	0	0	0	1*1*0.8	13.9302	2009-12-18	2011-02-15	death	A	GA	G	A	CT	GA	GT	G	1	2	0	1
W2789	411078A	624	2	44	1	1	1	1	4	3	3	0	0	0	1	4.8cm*4cm*0.9cm	14.0287	2012-05-30	2013-07-31	death	A	GA	A	AG	T	GA	GT	G	1	1	0	1
W0039	276822	58	1	56	1	2	1	0	3	2	3	1	1	1	1	2.5*1.8*0.8	14.1602	2008-09-09	2009-11-14	death	A	GA	A	AG	T	G	T	G	1	1	1	1
W1609	355557A	400	2	61	2	1	1	1	3	3	3	0	0	0	1	6*5*2	14.2259	2011-02-22	2012-04-30	death	A	A	A	AG	T	G	T	G	1	2	0	1
W1321	341195A	334	1	54	2	2	1	0	3	1	2	1	1	0	1	5.5×4×1	14.2587	2010-09-21	2011-11-29	death	G	G	GA	A	T	GA	GT	GA	1	1	1	1
W2386	391265A	555	1	72	1	2	1	1	4	2	3	1	1	0	1	3.5cm*3cm*1.3cm	14.2916	2011-12-21	2013-02-28	death	A	GA	A	A	T	G	GT	G	1	2	0	1
W3021	417719A	657	1	31	1	2	1	0	3	0	2	0	0	0	1	3cm*2cm*0.6cm	14.6858	2012-08-10	2013-10-31	death	AG	GA	G	A	T	G	T	GA	1	1	1	1
W2463	395300A	21	1	70	2	1	0	1	3	0	2	0	1	0	0	6cm*6cm*2cm	14.7187	2012-02-07	2013-04-30	death	A	G	A	G	CT	G	GT	G	1	2		1
W1523	351081A	386	1	45	2	1	1	1	3	3	3	0	1	0	1	5.5×4.5×1	14.7844	2011-01-06	2012-03-31	death	A	GA	GA	A	T	G	T	G	1	1	0	3
W3336	427223A	698	2	63	2	2	1	1	4	3	3	0	0	0	0	9.5cm*3cm*1cm	15.0144	2012-11-28	2014-02-28	death	A	G	A	AG	T	GA	GT	G	1	2	0	1
W3484	432659A	717	2	72	2	2	1	0	3	1	2	0	0	0	0	12*8*1.2	15.1129	2013-01-25	2014-04-30	death	A	GA	A	A	T	G	GT	G	1	2	0	1
W1700	358814A	757	1	57	2	1	1	1	3	1	2	0	0	0	1	5*4*2	15.3101	2011-03-22	2012-06-30	death	A	GA	A	A	T	GA	GT	G	1	1		1
W0771	311554	199	1	66	2	2	1	1	3	3	3	0	0	0	1	10*4.5*1.5	15.3429	2009-11-04	2011-02-14	death	AG	GA	GA	A	CT	G	9	G	1	2	1	3
W1010	325222A	240	1	50	1	1	1	1	3	2	3	0	1	0	1	4*3*1	15.4743	2010-04-16	2011-07-31	death	A	G	A	A	CT	G	T	G	1	1	1	1
W1416	345539A	360	1	61	1	1	1	1	3	2	3	1	0	1	0	3.8×3.4×0.7	15.6386	2010-11-10	2012-02-29	death	A	G	GA	AG	T	GA	9	G	1	2	1	1
W2925	414509A	27	2	52	2	1	1	0	3	3	3	0	0	0	1	7cm*5.3cm*2.1cm	15.7372	2012-07-09	2013-10-31	death	AG	GA	A	A	T	GA	GT	GA	1	1		1
W4122	163107A	222	1	47	2	2	0	1	3	1	2	0	0	0	0	5*4*1.5	15.8357	2013-11-19	2015-03-16	lost to follow-up	A	GA	GA	A	T	G	G	G	0	1	1	1
W2153	378339A	507	1	51	2	2	1	1	3	3	3	0	0	0	1	6.5cm*3cm*0.6cm	15.8357	2011-09-06	2012-12-31	death	AG	GA	A	AG	T	A	G	G	1	1	1	3
W1166	333257A	292	1	57	1	1	1	1	3	2	3	1	1	1	1	3.5x3.2x1.5	15.9014	2010-07-08	2011-11-04	death	A	G	GA	A	C	G	T	GA	1	1	1	1
W3986	457693A	335	2	60	1	2	1	1	4	2	3	0	0	0	0	3*2.5*0.8	15.9014	2013-09-24	2015-01-21	death	AG	GA	GA	A	T	GA	GT	GA	1	2	1	1
W0620	303303	158	1	62	1	2	1	0	3	3	3	1	1	0	1	3*3*1.5	16.1971	2009-07-30	2010-12-05	death	A	GA	GA	A	CT	GA	GT	G	1	2	0	1
W2051	374341	484	1	74	2	2	0	1	3	0	2	0	1	0	1	11cm*8cm*3cm	16.2957	2011-08-02	2012-12-10	death	A	GA	GA	A	CT	G	T	G	1	2	0	1
W3935	455518A	426	1	68	1	2	1	1	4	3	3	0	0	0	1	2*1.8*0.6	16.5257	2013-09-05	2015-01-21	death	AG	GA	GA	A	CT	G	T	GA	1	2	0	2
W0879	316869A	216	1	56	1	1	1	0	3	1	2	0	1	1	0	4.5*4*2.5	16.5585	2010-01-13	2011-06-01	death	A	G	A	G	T	A	G	G	1	1	1	1
W2225	381772A	523	1	59	1	2	1	1	4	3	3	1	1	0	0	4.5cm*4.3cm*1.2cm	16.5914	2011-10-12	2013-02-28	death	AG	A	GA	A	T	G	GT	GA	1	1	1	1
W0462	295381	116	1	71	2	1	0	0	3	1	2	0	1	0	0	7*3.5*1	16.6571	2009-05-08	2010-09-27	death	AG	A	A	A	T	A	G	GA	1	2	1	1
W1231	336710A	311	1	59	1	1	1	0	1	2	2	0	0	0	1	2×1.5×1	16.6899	2010-08-10	2011-12-31	death	AG	A	A	A	T	GA	GT	GA	1	1	1	1
W1808	364405A	436	1	43	2	2	1	1	3	3	3	0	0	0	1	7cm*5.5cm*1.4cm	16.7556	2011-05-09	2012-09-30	death	A	GA	A	AG	T	G	T	G	1	1	0	1
W0539	299243	138	2	39	1	2	1	1	3	2	3	0	0	0	1	4*1.5*1	16.8871	2009-06-18	2010-11-14	death	AG	GA	A	A	T	GA	9	GA	1	1	1	1
W2943	415530A	647	1	49	2	1	1	1	4	2	3	1	1	0	1	8cm*6cm*1.5cm	17.0185	2012-07-13	2013-12-13	death	A	G	G	A	T	G	T	G	1	1	1	1
W4029	459007A	47	2	59	2	2	0	1	3	2	3	0	1	0	1	7.5*4.5*1.5	17.0185	2013-10-14	2015-03-16	lost to follow-up	G	GA	A	AG	T	GA	GT	GA	0	1		1
W1507	350393A	378	1	56	2	2	1	1	4	2	3				0	侵及胃壁全层	17.0842	2010-12-28	2012-05-31	death	A	A	A	A	T	G	T	G	1	1	1	1
W2740	410014A	616	2	51	2	2	1	1	4	3	3	0	1	0	0	6cm*3.5cm*1cm	17.117	2012-05-28	2013-10-31	death	A	G	A	A	T	A	G	G	1	1	1	1
W2247	383064A	529	2	45	2	1	1	1	3	0	2	0	0	0	0	8cm*4cm*2cm	17.2156	2011-10-24	2013-03-31	death	AG	GA	A	AG	CT	A	G	GA	1	1	0	3
W1259	338225A	320	2	76	1	1	1	0	2	2	2	0	0	0	0	4×3.5×1.5	17.2485	2010-08-24	2012-01-31	death	A	A	A	A	T	GA	GT	G	1	2	1	1
W2032	373328A	479	1	84	2	2	1	0	3	1	2	0	0	0	0	9cm*6cm*0.8cm	17.2485	2011-07-25	2012-12-31	death	AG	A	A	A	T	GA	GT	GA	1	2	1	1
W2179	380040A	516	2	61	1	2	1	0	3	2	3	0	0	0	0	4cm*3.5cm*1.5cm	17.2813	2011-09-21	2013-02-28	death	A	GA	A	G	T	GA	GT	G	1	2	1	1
W2720	408870A	609	1	56	2	2	1	1	4	3	3	0	0	0	1	6cm*5cm*1cm	17.2813	2012-05-11	2013-10-19	death	AG	G	A	AG	T	GA	GT	G	1	1	0	2
W2089	376036A	490	1	73	2	2	1	1	4	3	3	0	0	0	1	6.8cm*5cm*0.5cm	17.5113	2011-08-17	2013-01-31	death	A	GA	A	A	T	GA	GT	G	1	2	1	1
W0542	299317	140	2	75	2	1	0	0	3	1	2	0	0	0	0	7*4*1.4	17.5441	2009-06-19	2010-12-05	death	A	G	A	G	T	GA	GT	G	1	2	1	1
W1536	351708A	388	1	68	1	2	1	0	3	2	3	0	0	0	1	4.5*4*0.8	17.7084	2011-01-12	2012-07-04	death	A	GA	GA	AG	9	GA	9	G	1	2	0	1
W0936	320699A	230	1	79	2	2	1	1	3	3	3	0	0	0	0	6*4*2	17.9384	2010-03-03	2011-08-31	death	A	G	GA	A	T	GA	GT	G	1	2	0	1
W2953	415676A	650	1	62	1	2	1	0	3	2	3	1	1	0	0	4.3cm*3.6cm*1.2cm	18.1684	2012-07-17	2014-01-21	death	A	GA	G	A	CT	A	G	G	1	2	0	1
W1596	355012A	397	2	55	1	1	1	0	3	1	2	0	1	0	1	2.3*2*1.4	18.2998	2011-02-21	2012-08-31	death	A	GA	A	AG	CT	GA	9	G	1	1	1	1
W0615	302486	156	1	70	1	1	1	1	3	2	3	0	0	0	0	4.5*3.6*0.5	18.3655	2009-07-22	2011-02-01	death	AG	GA	GA	A	T	GA	GT	GA	1	2	1	1
W2588	401426A	588	1	65	2	2	1	1	4	2	3	1	0	0	1	6cm*5cm*1.8cm	18.3984	2012-03-19	2013-09-30	death	A	G	A	A	T	A	GT	G	1	2	1	2
W2959	415465A	29	1	52	2	2	1	0	4	3	3	1	1	0	1	8cm*4.8cm*1cm	18.4641	2012-07-18	2014-01-31	death	A	GA	A	G	T	A	G	G	1	1		3
W1421	345934A	361	1	47	1	2	1	1	3	2	3	0	1	0	1	4×2.5×0.8	18.4969	2010-11-15	2012-05-31	death	A	G	GA	AG	T	G	T	G	1	1	1	1
W0481	296169	124	1	71	2	1	1	0	3	0	2	0	1	0	0	6.5*5.5*0.5	18.5955	2009-05-18	2010-12-05	death	A	GA	A	AG	CT	G	T	G	1	2	1	1
W2935	414915A	28	2	64	1	1	1	1	3	2	3	0	0	0	0	3cm*2.6cm*1.5cm	18.6283	2012-07-12	2014-01-30	death	AG	GA	A	A	CT	GA	GT	GA	1	2		3
W1838	364977A	444	1	63	2	1	1	0	3	3	3	0	0	0	1	5.5cm*4.5cm*3cm	18.6283	2011-05-13	2012-11-30	death	AG	G	GA	A	T	GA	GT	GA	1	2	1	1
W0475	295787	120	2	75	2	1	0	0	3	0	2	0	0	0	1	8*7*1	18.694	2009-05-13	2010-12-03	death	A	GA	A	AG	CT	GA	GT	G	1	2	0	1
W0927	320435A	229	2	51	2	2	1	1	3	3	3	0	0	0	0	5.5*4.5*1	18.7269	2010-02-25	2011-09-18	death	A	A	GA	AG	CT	GA	GT	G	1	1	1	3
W3122	420023A	34	1	49	1	2	1	1	3	2	3	0	1	0	1	2cm*1.5cm*1cm	18.7926	2012-09-05	2014-03-31	death	A	GA	A	A	CT	A	GT	G	1	1		1
W1513	350879A	381	1	55	1	2	1	0	3	3	3	0	1	0	1	3.5×3×1	18.8583	2011-01-04	2012-07-31	death	A	A	A	AG	CT	GA	GT	G	1	1	1	1
W1388	344077A	348	2	79	1	2	1	1	3	1	2	0	0	0	0	3×1.5×2	18.924	2010-10-27	2012-05-25	death	AG	GA	GA	A	T	G	T	GA	1	2	1	1
W0891	318170A	221	1	64	2	2	1	1	3	1	2	0	0	0	1	7.5*6*1.5	19.1211	2010-01-26	2011-08-31	death	AG	GA	A	AG	CT	GA	GT	G	1	2	1	3
W0574	300684	149	1	58	1	2	1	1	3	3	3	1	0	0	1	4	19.1869	2009-07-03	2011-02-07	death	A	GA	GA	AG	T	A	G	G	1	1	1	1
W0675	304905	176	1	76	2	1	1	0	3	1	2	0	0	0	1	7*5*0.6	19.384	2009-08-18	2011-03-31	death	A	G	GA	A	T	GA	GT	G	1	2	1	1
W1718	359867A	418	1	76	2	1	1	0	3	2	3	0	0	0	1	9cm*7.5cm*1.8cm	19.5483	2011-03-30	2012-11-14	death	A	G	A	A	T	GA	GT	G	1	2	0	1
W0703	306722	184	1	54	1	2	1	1	3	3	3	1	1	0	1	3*3*1.5	19.6797	2009-09-07	2011-04-29	death	A	GA	A	G	T	GA	GT	G	1	1	1	1
W3013	416976A	656	1	71	1	1	1	1	3	1	2	0	0	0	0	3cm*2.5cm*0.8cm	19.9097	2012-08-02	2014-03-31	death	A	GA	A	G	T	G	GT	G	1	2	1	2
W1212	335883A	306	2	54	1	2	1	0	3	1	2	0	1	1	0	1.8×1×1	20.0411	2010-07-30	2012-03-31	death	G	GA	GA	A	T	GA	GT	G	1	1	1	3
W2891	413796A	633	1	69	2	2	1	1	4	2	3	0	0	0	1	6cm*3.5cm*0.8cm	20.5667	2012-06-29	2014-03-17	death	A	A	G	AG	T	GA	GT	G	1	2	0	1
W0652	303928	170	1	70	2	2	1	0	3	2	3	0	0	0	0	6*4*0.9	20.7639	2009-08-06	2011-04-30	death	A	G	A	AG	CT	A	G	G	1	2	1	1
W1805	363867A	435	1	63	2	1	1	1	3	3	3	0	0	0	0	5.5cm*5cm*1.5cm	20.961	2011-05-04	2013-01-31	death	A	G	A	A	T	GA	GT	G	1	2	1	1
W1859	366611A	448	1	57	2	2	1	1	2	3	3	0	0	0	0	5.5cm*4.5cm*1cm	21.1581	2011-05-26	2013-02-28	death	A	G	A	A	CT	G	GT	G	1	1	1	1
W1440	347141A	368	1	59	2	1	1	1	3	3	3	1	1	1	1	5×4.5×0.7	21.1581	2010-11-26	2012-08-31	death	A	GA	GA	AG	T	G	T	G	1	1	1	1
W0679	305381	179	1	80	1	2	1	1	3	1	2	0	1	0	0	3.5*3*1	21.191	2009-08-24	2011-05-31	death	AG	A	GA	A	T	GA	GT	GA	1	2	1	1
W1774	363727A	767	1	56	1	2	1	0	1	0	1	0	0	0	0	1cm*0.8cm*0.6cm	21.3552	2011-04-22	2013-01-31	death	G	G	A	AG	T	GA	G	A	1	1		3
W3212	423809A	676	1	65	2	2	1	1	3	2	3	0	0	0	0	8cm*7cm*1.8cm	21.4538	2012-10-16	2014-07-31	death	AG	GA	G	A	T	G	T	GA	1	2	1	1
W3141	420781A	36	1	41	2	2	1	1	4	3	3	1	1	0	1	6.5cm*3cm*1cm	21.5195	2012-09-13	2014-06-30	death	A	G	A	A	T	GA	GT	G	1	1		2
W3616	439916A	739	1	70	1	2	1	0	2	2	2	0	0	0	1	4*4*1.5	21.6838	2013-04-11	2015-01-31	death	A	GA	GA	AG	T	G	T	G	1	2	1	1
W1635	356857A	409	1	57	1	1	1	1	3	2	3	0	0	0	1	3*2*1.5	21.9466	2011-03-03	2012-12-30	death	A	G	A	AG	T	G	9	G	1	1	0	1
W1090	329677A	268	1	56	2	2	1	0	3	1	2	0	1	1	0	6.5x5x1	22.1109	2010-05-28	2012-03-31	death	AG	A	GA	A	T	G	T	GA	1	1	0	1
W3320	426729A	695	2	50	2	2	1	1	4	3	3	0	0	0	0	8cm*6.5cm	22.2423	2012-11-22	2014-09-30	death	A	GA	A	AG	T	A	G	G	1	1	1	3
W3701	445547A	640	2	46	1	2	1	1	3	3	3	0	0	0	1	3.5*2*0.7	22.308	2013-06-04	2015-04-14	death	A	G	GA	A	T	A	9	G	1	1	1	1
W2041	373662A	483	1	58	2	2	1	1	3	3	3	0	0	0	0	999	22.308	2011-07-27	2013-06-05	death	G	GA	A	G	CT	GA	GT	A	1	1	1	2
W2429	393253A	561	1	56	2	2	1	0	4	3	3	0	0	0	0	5cm*5cm*1.5cm	22.4066	2012-01-12	2013-11-24	death	AG	G	G	A	T	A	G	GA	1	1	0	1
W1059	327940A	259	1	70	1	2	1	1	3	1	2	0	0	0	1	3.5*3*0.8	22.6037	2010-05-13	2012-03-31	death	AG	G	A	A	T	GA	GT	G	1	2	1	1
W1706	359065A	5	1	66	1	2	1	0	3	1	2	0	0	0	0	3*2.7*1.5	22.768	2011-03-24	2013-02-14	death	A	G	A	A	T	GA	GT	G	1	2		3
W3070	418706A	664	1	31	1	2	1	1	4	2	3	0	0	0	1	4cm*2cm*1.1cm	22.8994	2012-08-21	2014-07-19	death	A	GA	A	AG	T	A	G	G	1	1	1	1
W1307	340367A	329	1	72	1	2	1	1	3	1	2	0	1	0	0	3.2×3×0.5	22.9979	2010-09-14	2012-08-14	death	A	G	A	G	T	GA	GT	G	1	2	1	1
W3090	419486A	667	1	72	1	1	1	1	4	3	3	0	0	0	0		23.0637	2012-08-28	2014-07-31	death	A	GA	GA	A	CT	GA	GT	9	1	2	1	1
W2391	391054A	556	1	57	2	2	0	0	3	3	3	1	1	0	1	5cm*4.5cm*1.5cm	23.1622	2011-12-23	2013-11-27	death	AG	A	A	A	CT	GA	GT	G	1	1	1	1
W2166	379376A	775	1	57	2	2	1	1	3	2	3	0	1	0	1	7.5cm*4.5cm*1.5cm	23.4251	2011-09-16	2013-08-29	death	A	GA	A	AG	CT	9	GT	G	1	1		1
W3851	451616A	492	1	49	1	2	1	1	3	3	3	0	0	0	0	4.3*1.5*1.1	23.4579	2013-07-30	2015-07-14	death	A	GA	GA	AG	T	G	GT	G	1	1	1	1
W3577	437854A	730	2	78	2	2	1	1	4	3	3	0	0	0	0	12*6*1	23.5893	2013-03-26	2015-03-14	death	A	G	GA	A	CT	G	T	G	1	2	1	2
W0782	311548	202	1	53	1	1	1	0	3	2	3	0	1	0	1	4.3*3.5*1.0	23.655	2009-11-10	2011-10-31	death	AG	G	G	A	T	GA	GT	GA	1	1	0	1
W3543	436246A	724	1	46	1	2	1	1	4	3	3	0	0	0	1	3*3*1	23.7864	2013-03-07	2015-03-01	death	A	G	A	AG	CT	G	GT	G	1	1	1	1
W0633	303562	163	1	67	1	1	1	0	3	2	3	1	0	1	1	3.5*3*1	23.885	2009-08-03	2011-07-31	death	AG	G	G	A	T	GA	GT	GA	1	2	1	1
W2262	384018A	532	2	49	1	2	1	1	3	3	3	0	0	0	1	3cm*2cm*0.5cm	23.9836	2011-11-01	2013-10-31	death	A	GA	A	G	CT	GA	GT	G	1	1	0	3
W2322	387178A	547	1	71	2	2	1	0	3	0	2	0	1	0	0	6cm*5.5cm*0.8cm	24.0164	2011-11-23	2013-11-23	lost to follow-up	A	GA	GA	AG	T	G	T	G	0	2	1	1
W2052	375136A	774	1	40	2	2	1	1	3	3	3	0	0	0	1	5cm*4cm*0.8cm	24.0164	2011-08-02	2013-08-02	lost to follow-up	G	GA	GA	A	T	GA	GT	GA	0	1		1
W0440	293531	113	2	60	1	2	0	0	1	0	1	0	1	0	0	1.5	24.02	2009-04-17	2011-04-18	death	A	G	A	AG	T	9	G	G	1	2	0	1
W2109	377006A	494	2	70	1	2	1	1	4	2	3	0	0	0	0	4.5cm*3cm*0.8cm	24.1478	2011-08-25	2013-08-29	death	A	A	GA	A	T	GA	GT	G	1	2	0	1
W2901	414023A	636	1	76	2	2	1	1	4	3	3	0	1	0	0	9.4cm*7.6cm*1.9cm	24.2793	2012-07-03	2014-07-12	death	A	G	A	AG	T	GA	GT	G	1	2	0	1
W2795	411246A	23	1	60	2	2	1	1	4	2	3	0	0	0	0	5.5cm*4cm*0.8cm	24.8049	2012-06-05	2014-06-30	death	A	A	A	A	T	GA	GT	G	1	2		1
W2531	398618A	575	1	66	1	2	0	0	2	1	2	0	0	0	0	2.5cm*2.3cm*0.6cm	25.0021	2012-02-29	2014-03-31	death	A	A	A	G	T	GA	9	G	1	2	1	1
W3310	426471A	692	1	76	1	1	1	1	3	2	3				0	2.8cm*2.8cm*1cm	25.2977	2012-11-21	2014-12-31	death	A	G	A	AG	C	G	T	G	1	2	1	1
W1694	358339A	413	1	82	2	1	1	1	3	2	3	0	0	0	0	5.*4*1.3	25.4292	2011-03-18	2013-04-30	death	A	G	GA	A	T	GA	GT	G	1	2	1	1
W3199	422961A	674	1	58	2	2	1	1	4	3	3	0	0	0	0	10.0cm*7.5cm*1.2cm	25.4292	2012-10-11	2014-11-24	death	A	G	GA	AG	T	GA	GT	G	1	1	0	2
W1424	345901E	363	2	69	2	1	1	1	3	2	3	0	1	0	1	7×4×0.8	25.5277	2010-11-15	2012-12-31	death	A	G	A	AG	CT	GA	GT	G	1	2	1	1
W4131	463728A	50	1	72	2	2	1	1	3	3	3	0	0	0	1	6.5*5*1.3	25.6263	2013-11-25	2016-01-14	death	A	GA	A	AG	T	A	GT	G	1	2		1
W2665	406153A	595	2	80	1	2	1	1	4	2	3	0	0	0	0	4.5cm*3.5cm*1.6cm	25.8234	2012-04-20	2014-06-15	death	AG	GA	A	AG	T	GA	GT	G	1	2	1	2
W0785	311782	203	1	69	1	2	0	0	3	0	2	1	1	0	1	4.5*2.5*0.9	26.1848	2009-11-12	2012-01-18	lost to follow-up	AG	GA	GA	A	CT	GA	GT	GA	0	2	1	1
W3553	436529A	727	1	70	1	2	1	1	3	3	3	0	0	0	1	3*3*0.7	26.5791	2013-03-13	2015-05-31	death	A	G	A	AG	T	GA	GT	G	1	2	1	1
W1528	351533A	387	2	67	2	2	1	1	3	3	3	0	0	0	0	5*4*1	26.6448	2011-01-10	2013-03-31	death	AG	GA	A	AG	T	G	T	GA	1	2	0	1
W1893	367677A	452	2	54	2	2	1	1	3	2	3	0	0	0	1	18cm*6cm*0.8cm	26.809	2011-06-07	2013-08-31	death	A	GA	A	AG	T	G	GT	G	1	1	1	1
W0415	292235	108	2	64	1	1	1	1	3	2	3	0	0	0	1	4*2.8*0.8	26.8747	2009-04-03	2011-06-30	death	A	GA	A	AG	T	A	G	G	1	2	0	1
W2194	380802A	519	1	55	1	2	1	1	4	3	3	0	1	0	1	3cm*3cm*1.2cm	27.0719	2011-09-29	2013-12-31	death	AG	GA	GA	A	T	GA	9	GA	1	1	1	3
W3228	423562A	677	1	57	1	2	1	1	3	3	3	1	1	0	1	4cm*3.2cm*1cm	27.4333	2012-10-18	2015-01-31	death	A	GA	A	AG	CT	G	T	G	1	1	0	2
W1309	340522A	331	1	57	2	2	1	0	3	1	2	1	1	0	1	5×4.5×0.8	27.5318	2010-09-15	2012-12-31	death	G	GA	A	AG	T	GA	GT	GA	1	1	1	1
W1447	347477A	370	1	56	1	2	1	1	2	1	2	1	1	0	1	2.5×2×0.8	27.5975	2010-11-30	2013-03-19	death	A	G	GA	AG	CT	G	T	G	1	1		3
W4022	458561A	313	1	69	1	2	1	1	4	3	3	1	1	0	0	2.5*1.5*0.5	27.7947	2013-11-06	2016-03-01	death	AG	G	A	A	CT	GA	GT	G	1	2	0	1
W1961	370542A	465	1	69	2	1	1	1	3	3	3	0	0	0	1	5cm*3cm*1.5cm	28.0575	2011-06-30	2013-10-31	death	A	GA	A	A	T	A	GT	G	1	2	0	1
W1940	369956A	463	1	75	2	2	1	0	3	1	2	0	0	0	0	10cm*9cm*2cm	28.2546	2011-06-24	2013-10-31	death	AG	GA	A	AG	T	GA	GT	GA	1	2	1	3
W2232	382623A	525	1	43	1	2	1	0	3	3	3	0	0	0	1	3.5cm*2cm*1.7cm	28.616	2011-10-14	2014-03-03	death	AG	G	A	G	C	GA	T	G	1	1	1	1
W1512	350878A	380	2	71	2	1	1	0	3	1	2	0	0	0	0	5×4×0.8	28.846	2011-01-04	2013-05-31	death	A	9	A	AG	CT	9	9	G	1	2	0	1
W3262	424601A	683	1	64	1	2	1	1	4	3	3	0	0	0	1	3.5cm*2.5cm*0.6cm	28.9446	2012-10-31	2015-03-31	death	A	G	G	A	T	GA	GT	G	1	2	1	1
W1032	326497A	249	1	63	2	1	0	0	3	0	2	0	0	0	0	7*5*4	29.076	2010-04-29	2012-09-30	death	A	G	GA	A	CT	GA	GT	G	1	2	1	3
W3984	457227A	385	1	69	2	2	0	0	3	2	3	0	0	0	0	6.5*6*1.2	29.2402	2013-09-23	2016-03-01	alive	A	A	A	A	T	G	T	G	0	2	1	1
W1379	343707A	344	1	52	2	2	1	1	3	2	3	1	1	0	1	8.5×7×2	29.2731	2010-10-22	2013-03-31	death	A	G	GA	AG	CT	G	T	G	1	1	0	1
W2125	376699A	498	1	56	2	2	1	1	3	3	3	1	1	0	1	5.5cm*5cm*1.5cm	29.306	2011-08-23	2014-01-31	death	AG	GA	GA	A	CT	G	GT	GA	1	1	0	1
W1916	368722A	457	1	76	2	2	1	0	3	3	3	0	1	0	0	8cm*7cm*2cm	29.5359	2011-06-15	2013-11-30	death	A	G	GA	AG	T	G	GT	G	1	2	1	3
W3964	456294A	46	1	57	1	2	1	1	4	0	3	0	0	0	1	4*2*1.2	29.6016	2013-09-12	2016-03-01	alive	G	G	A	A	T	GA	GT	G	0	1		1
W0374	291164	101	1	42	1	2	1	0	2	1	2	1	1	0	1	2*2*0.8	29.6674	2009-03-19	2011-09-08	death	A	G	A	G	CT	A	G	G	1	1	1	1
W1591	360453A	396	1	35	2	2	1	1	3	1	2	0	1	1	1	8*5*2	29.6674	2011-04-06	2013-09-25	death	A	GA	A	A	CT	GA	GT	G	1	1	1	1
W2149	378167A	506	1	42	1	2	1	1	4	3	3	0	0	0	1	4cm*3.5cm*1.5cm	29.8316	2011-09-05	2014-03-01	death	AG	G	GA	A	T	GA	GT	GA	1	1	1	1
W1399	344804A	351	1	54	1	2	1	1	3	3	3	0	0	1	1	4×4×0.5	29.8645	2010-11-03	2013-04-30	death	AG	GA	A	AG	CT	GA	GT	GA	1	1	1	1
W3890	453431A	445	1	64	1	2	0	0	1	0	1	0	0	0	0	0.9*0.3	30.0287	2013-08-14	2016-02-14	death	A	G	A	AG	CT	GA	GT	G	1	2	1	1
W3926	456004A	432	1	62	2	2	1	1	3	2	3	1	1	0	0	5.5*3.5*1.2	30.0616	2013-08-29	2016-03-01	alive	A	G	GA	A	T	A	GT	G	0	2	1	2
W2928	414852A	643	2	60	1	2	1	1	4	3	3	1	0	0	0	3.7cm*3.5cm*1cm	30.7187	2012-07-10	2015-01-31	death	AG	G	GA	A	T	G	T	GA	1	2	0	1
W1505	350306A	749	1	40	1	2	0	0	1	0	1	1	1	0	0	1.3cm×0.8cm×0.7cm	31.0801	2010-12-28	2013-07-31	death	AG	GA	A	AG	CT	GA	GT	GA	1	1		1
W1127	331484A	278	1	71	2	1	1	0	2	1	2	0	0	0	0	5x4x4	31.1786	2010-06-22	2013-01-26	death	A	GA	A	AG	CT	GA	GT	G	1	2	0	1
W2437	393612A	792	1	60	2	2	1	0	4	3	3	0	0	0	1	11cm*5cm*1cm	31.4743	2012-01-16	2014-08-31	death	A	G	A	A	T	G	9	G	1	2		3
W4165	465689A	261	1	72	1	2	0	0	1	0	1	0	0	0	0	3*2.5*0.4	31.6386	2013-12-11	2016-07-31	death	A	GA	G	A	CT	G	GT	G	1	2	0	1
W2886	413795A	632	1	44	1	2	1	0	1	1	1	0	0	0	0	2.5cm*2cm*0.8cm	31.9343	2012-06-27	2015-02-24	death	A	A	GA	A	CT	GA	GT	G	1	1	0	2
W2146	377661A	505	1	72	1	2	1	1	3	3	3	0	1	0	1	4.7cm*4.5cm*0.7cm	31.9671	2011-08-31	2014-04-30	death	A	G	A	AG	T	A	T	G	1	2	1	3
W1546	352207A	751	1	60	1	1	1	1	3	1	2	1	0	0	0	2.2*2*1	32.5257	2011-01-14	2013-09-30	death	A	G	A	G	T	GA	GT	G	1	2		1
W1028	326351A	246	1	44	1	2	1	0	3	0	2	0	0	0	1	3*3*1	33.577	2010-04-28	2013-02-13	death	AG	GA	GA	A	T	GA	GT	G	1	1	1	1
W4061	460279A	322	1	64	1	2	1	1	3	3	3	0	0	0	0	2.5*2*0.4	34.1684	2013-10-24	2016-08-29	death	A	GA	A	G	T	G	GT	G	1	2	1	1
W1413	346335A	358	2	66	1	2	1	1	3	3	3	0	1	0	0	4×3.5×0.6	34.4312	2010-11-17	2013-09-30	death	A	G	A	A	T	G	T	G	1	2	1	1
W0488	296671	127	1	71	2	1	1	1	3	1	2	0	1	0	0	5*3*1.7	34.5626	2009-05-22	2012-04-08	death	A	GA	A	G	T	A	G	G	1	2	1	1
W3606	439450A	738	2	34	2	1	1	1	3	1	2	0	0	0	1	6*5*3	34.7269	2013-04-09	2016-03-01	alive	AG	G	GA	AG	CT	GA	GT	GA	0	1	1	3
W2710	407463A	607	2	71	1	2	0	0	1	3	2	0	0	0	1	2cm*2cm*0.8cm	35.0554	2012-04-28	2015-03-31	death	A	G	A	A	T	G	GT	G	1	2	1	2
W0378	291161	102	1	73	1	2	1	1	2	1	2	1	0	0	0	4*2.5*1	35.0554	2009-03-24	2012-02-24	lost to follow-up	AG	G	GA	AG	CT	G	T	G	0	2	1	1
W3585	438450A	732	1	78	2	2	1	1	4	2	3	0	0	0	0	12*5*1.5	35.0883	2013-03-29	2016-03-01	death	AG	GA	A	AG	CT	GA	GT	G	1	2	1	2
W1265	338899A	321	1	47	1	2	1	0	3	3	3	0	1	1	1	4×3×0.5	35.2197	2010-08-26	2013-08-02	death	A	GA	A	G	T	GA	GT	G	1	1	1	1
W0720	307950	187	1	60	1	1	1	1	3	1	2	1	1	1	1	2.5*2*0.6	35.3183	2009-09-21	2012-08-31	death	A	GA	A	G	CT	A	GT	G	1	2	1	1
W3572	437180A	729	1	61	1	2	0	1	2	0	1	1	1	0	0	2.5*2*0.5	35.4168	2013-03-19	2016-03-01	alive	A	GA	GA	A	T	A	G	G	0	2	1	1
W2126	377039A	499	1	43	1	2	1	1	3	2	3	1	1	0	1	4cm*3.5cm*0.8cm	35.6797	2011-08-24	2014-08-14	death	AG	GA	A	AG	T	GA	GT	GA	1	1	0	2
W1914	368624A	455	1	65	1	2	0	0	1	0	1	1	1	0	0	3.5cm*3cm*0.5cm	35.9097	2011-06-14	2014-06-11	lost to follow-up	A	A	GA	A	T	A	G	G	0	2	0	1
W3723	447047A	540	1	38	1	2	1	1	2	3	3	0	0	0	1	3*2.5*0.5	35.9097	2013-06-09	2016-06-06	alive	A	G	A	AG	T	G	T	G	0	1	1	1
W1800	363723A	434	1	76	2	1	1	1	3	3	3	0	1	0	1	6cm*4cm*1.8cm	35.9097	2011-05-03	2014-04-30	death	A	G	A	G	T	A	9	G	1	2	0	1
W0121	280095	72	1	76	1	2	1	1	3	2	3	0	0	0	0	4*3*1	35.9097	2008-10-30	2011-10-28	death	A	GA	A	AG	CT	G	T	G	1	2	0	3
W4190	466304A	183	1	57	1	2	1	0	2	1	2	0	0	0	1	2.5*0.5*0.4	37.0267	2013-12-17	2017-01-17	alive	A	GA	GA	A	CT	GA	GT	G	0	1	1	1
W3485	432799A	719	1	37	1	2	0	0	2	2	2	1	1	0	0	2.5*2*0.8	37.0595	2013-01-28	2016-03-01	alive	AG	G	A	G	T	A	9	G	0	1	1	1
W4169	465514A	262	1	46	2	2	1	1	4	2	3	1	1	0	1	6*4*1	37.2567	2013-12-10	2017-01-17	alive	A	GA	GA	AG	T	GA	GT	G	0	1	1	1
W1187	334381A	298	1	78	1	1	1	1	3	1	2	0	0	0	0	4x3x1.4	37.3881	2010-07-20	2013-08-31	death	A	GA	A	AG	CT	G	T	G	1	2	1	1
W4151	464703A	195	1	68	1	1	0	0	1	0	1	0	0	0	0	1.2*0.6*0.4	37.4538	2013-12-03	2017-01-16	alive	A	A	A	A	CT	A	GT	G	0	2	1	1
W2590	401551A	589	1	80	2	1	0	0	3	2	3	1	1	0	0	5*3*1.4	37.4538	2012-03-16	2015-04-30	death	A	GA	GA	AG	CT	A	G	G	1	2	1	1
W1179	333858A	296	1	61	1	1	1	1	3	2	3	0	1	0	1	4x3.5x0.7	37.5852	2010-07-14	2013-08-31	death	A	GA	GA	A	T	G	T	G	1	2	1	1
W2416	392334A	789	1	63	2	1	1	0	3	3	3	1	1	0	1	6cm*3cm*2.5cm	37.7823	2012-01-05	2015-02-28	death	A	G	G	A	CT	GA	G	G	1	2		1
W4204	467714A	59	1	50	1	2	0	0	2	2	2	0	0	0	0	3*1.5*0.7	38.3737	2013-12-24	2017-03-06	alive	A	GA	A	A	T	A	GT	G	0	1	1	2
W2115	376861A	497	1	50	1	2	0	0	2	0	1	0	1	1	1	2.5cm*2cm*0.6cm	38.4394	2011-08-23	2014-11-05	lost to follow-up	A	G	GA	A	T	G	T	G	0	1	1	1
W0910	319123A	224	1	64	2	2	1	1	3	1	2	0	0	0	1	5*5*1	38.7351	2010-02-05	2013-04-29	death	A	G	A	AG	T	GA	GT	G	1	2	1	1
W3319	427040A	694	1	55	1	2	1	1	2	2	2	1	1	0	0	1.5cm*1cm*0.4cm	39.2608	2012-11-22	2016-03-01	alive	A	G	A	A	T	GA	G	G	0	1	1	2
W3291	425633A	689	1	54	1	2	1	1	3	1	2	0	0	0	0	2.2cm*1.8cm*0.5cm	39.6879	2012-11-09	2016-03-01	alive	AG	GA	A	A	T	GA	GT	GA	0	1	1	2
W3270	424792A	685	1	63	1	1	0	0	1	0	1	0	0	0	0	3cm*2.4cm*1cm	39.9507	2012-11-01	2016-03-01	alive	AG	A	GA	AG	T	GA	9	GA	0	2	1	1
W3260	425044A	682	2	60	1	2	1	0	2	2	2	0	0	0	1	3.4cm*3cm*0.5cm	40.0164	2012-10-30	2016-03-01	alive	A	G	A	A	CT	GA	GT	G	0	2	1	1
W4047	460183A	328	1	41	1	2	1	1	4	2	3	0	0	0	1	4.5*3.7*1.7	40.3778	2013-10-24	2017-03-06	alive	A	GA	GA	A	CT	GA	GT	G	0	1	1	3
W4020	458966A	312	1	67	2	2	1	0	3	2	3	0	0	0	0	5*4.5*1	40.7064	2013-10-14	2017-03-06	alive	A	G	G	A	T	A	GT	G	0	2	0	1
W4023	458597A	353	2	64	2	2	1	1	4	1	3	0	0	0	1	7*5.5*1.7	40.8378	2013-10-10	2017-03-06	alive	A	GA	GA	A	CT	G	T	G	0	2	1	1
W2694	406621A	602	1	62	2	2	0	0	1	2	2	0	1	0	1	6cm*4cm*0.7cm	41.1992	2012-04-24	2015-09-30	death	A	GA	A	AG	T	G	GT	G	1	2	0	2
W3037	418204A	659	1	84	2	2	1	1	4	3	3	0	0	0	0	5cm*4cm*1.5cm	41.3634	2012-08-16	2016-01-27	death	AG	G	GA	A	T	G	T	GA	1	2	1	2
W1909	368065A	454	1	56	1	2	1	0	3	1	2	0	0	0	0	3.5cm*2.5cm*2.0cm	41.5277	2011-06-09	2014-11-24	alive	AG	G	GA	AG	T	G	GT	GA	0	1	0	1
W2088	375916A	489	2	44	1	2	1	1	4	3	3	0	1	0	1	4cm*2.2cm*1.3cm	41.5277	2011-08-16	2015-01-31	death	AG	GA	GA	A	T	A	GT	GA	1	1	0	3
W3138	420755A	673	2	46	1	2	0	1	3	0	2	0	0	0	1	2.3cm*1.2cm	41.5934	2012-09-12	2016-03-01	alive	A	GA	A	A	CT	GA	GT	G	0	1	1	2
W1173	333571A	295	2	73	1	1	0	0	1	0	1	0	0	0	0	3x2x0.5	41.6591	2010-07-12	2013-12-31	death	A	GA	GA	A	T	GA	GT	G	1	2	1	1
W3125	420098A	672	1	68	1	2	1	1	3	2	3	0	0	0	0	3.5cm*2.5cm*1.2cm	41.7906	2012-09-06	2016-03-01	alive	A	GA	A	A	9	GA	GT	G	0	2	1	1
W3956	455853A	404	2	63	1	2	1	1	3	3	3	0	0	0	1	3*2.5*0.8	41.8563	2013-09-09	2017-03-06	alive	AG	GA	GA	AG	T	GA	GT	G	0	2	0	1
W3949	455519A	410	1	44	2	2	0	1	3	1	2	0	0	0	1	7*4.5*0.7	41.9877	2013-09-05	2017-03-06	alive	AG	GA	GA	AG	T	A	G	G	0	1	0	2
W3937	455049A	419	2	68	2	2	1	1	3	2	3	0	0	0	0	10*6*1	42.0862	2013-09-02	2017-03-06	alive	A	G	A	G	CT	G	T	G	0	2	1	1
W3330	427338A	697	2	62	2	2	1	1	4	2	3	0	0	0	1	5.5cm*3cm*1.5cm	42.0862	2012-11-27	2016-05-31	death	A	A	G	A	T	G	T	G	1	2	1	1
W3406	429680A	706	1	52	2	2	1	0	4	2	3	0	0	0	1	5.5cm*4cm*3.4cm	42.1848	2012-12-25	2016-07-01	alive	A	G	A	AG	T	A	G	G	0	1	1	1
W2435	393251A	791	1	56	1	2	1	1	4	3	3	1	1	0	1	1.5cm*1.5cm*0.8cm	42.2505	2012-01-12	2015-07-21	death	A	G	GA	A	T	G	T	G	1	1		1
W3065	418576A	662	1	50	1	2	1	1	3	2	3	0	1	0	1	1.7cm*1.3cm*0.5cm	42.3162	2012-08-21	2016-03-01	alive	AG	G	GA	A	CT	G	GT	GA	0	1	1	1
W4203	466909A	98	2	66	1	2	1	1	2	1	2	0	1	0	0	3*3*0.6	42.5462	2013-12-23	2017-07-10	alive	A	GA	A	AG	C	G	GT	G	0	2	1	1
W2992	417314A	653	1	59	2	2	1	1	3	3	3	1	1	0	1	10.5cm*10cm*2cm	42.7762	2012-08-07	2016-03-01	alive	A	GA	GA	AG	CT	GA	GT	G	0	1	1	1
W3862	452400A	491	2	62	1	1	0	0	1	1	1	0	0	0	0	2.2*1.3*0.2	42.9076	2013-08-08	2017-03-06	alive	A	GA	GA	A	T	GA	T	G	0	2	1	1
W1499	350241A	376	1	62	2	1	1	0	3	1	2	1	1	0	0	6×4.5×1	43.1047	2010-12-27	2014-07-31	death	A	G	GA	AG	T	GA	GT	G	1	2	1	1
W3197	422745A	42	1	78	2	2	1	0	3	3	3	0	0	0	1	5.0cm*4.0cm*1.5cm	43.1704	2012-10-10	2016-05-16	death	A	G	A	AG	T	GA	GT	G	1	2		1
W1749	361630A	423	2	51	1	2	1	1	3	3	3	0	1	0	0	2.5cm*2cm*1.2cm	43.3676	2011-04-14	2014-11-24	death	A	A	A	AG	T	GA	GT	G	1	1	1	1
W0480	296565	123	1	56	1	1	1	1	3	2	3			0	0	4.5*4*0.5	43.3676	2009-05-21	2012-12-31	death	AG	G	A	G	T	G	T	G	1	1	1	1
W2578	401034A	797	1	55	1	2	0	0			2	1	0	0	1		43.5318	2012-03-15	2015-10-31	death	A	G	GA	A	T	G	T	G	1	1		1
W0914	319381A	226	1	71	2	2	1	1	3	2	3	0	1	0	1	5.5*4*1.5	43.6304	2010-02-10	2013-09-30	death	AG	A	A	AG	T	GA	GT	GA	1	2	1	1
W1157	332654A	290	1	82	1	2	1	1	3	0	2	1	0	0	0	3x2.5x1	43.9261	2010-07-02	2014-02-28	death	G	GA	G	A	T	A	G	GA	1	2	0	1
W2892	413746A	634	1	49	1	2	1	1	3	1	2	0	1	0	1	3.6cm*3cm*0.8cm	44.0575	2012-06-29	2016-03-01	alive	A	GA	A	A	T	A	G	G	0	1	1	3
W1019	326470A	243	2	39	1	1	1	1	3	2	3	0	1	0	0	4.5*2*1	44.0903	2010-04-29	2013-12-31	death	A	G	GA	A	T	G	GT	G	1	1	0	1
W1255	337856A	318	1	74	2	1	1	0	2	1	2	0	0	0	0	6×5×2.5	44.1232	2010-08-20	2014-04-24	death	A	A	A	G	T	GA	GT	G	1	2	0	1
W1649	357312A	411	1	88	2	2	1	1	3	1	2	0	0	0	0	5*4.5*1.2	44.3203	2011-03-10	2014-11-18	death	A	GA	GA	AG	T	GA	GT	G	1	2	0	1
W2721	412210A	610	1	63	1	2	1	1	3	3	3	1	1	0	0	3.4cm*2.7cm*2.1cm	44.5832	2012-06-13	2016-03-01	alive	A	G	A	A	T	A	GT	G	0	2	1	1
W1634	356679A	408	1	64	1	2	1	1	3	1	2	0	1	0	1	3.5*2.8*1	44.7474	2011-03-03	2014-11-24	death	AG	GA	GA	A	CT	GA	GT	GA	1	2	1	1
W0690	306163	181	1	65	1	1	0	1	3	1	2	1	1	0	0	2.5*1.5*1	44.8789	2009-08-31	2013-05-28	death	A	GA	A	AG	CT	G	T	G	1	2	1	1
W3715	445754A	551	1	65	1	2	1	1	3	1	2	0	0	0	0	4*3*1.2	45.306	2013-06-07	2017-03-17	alive	AG	GA	A	AG	CT	G	T	G	0	2	0	1
W2741	409804A	617	1	66	2	1	1	1	3	3	3	0	1	0	0	7.5cm*6cm*1.8cm	45.4374	2012-05-18	2016-03-01	death	A	GA	A	AG	T	G	T	G	1	2	1	1
W1954	370294A	464	1	80	1	1	1	0	3	3	3	0	1	0	1	4cm*2.5cm*1cm	45.6345	2011-06-29	2015-04-18	death	AG	GA	GA	A	T	G	GT	G	1	2	1	1
W2804	411575A	626	2	66	2	2	1	1	3	3	3	0	0	0	0	7cm*4.2cm*1.2cm	45.7331	2012-06-06	2016-03-29	death	A	G	A	G	T	G	T	G	1	2	1	3
W3971	456590A	399	1	37	1	2	0	0	1	0	1	1	0	0	0	1.5*1.3*0.5	45.7659	2013-09-16	2017-07-10	alive	AG	GA	A	AG	T	GA	GT	G	0	1	1	1
W1826	364564A	758	1	57	1	2	0	1	1	0	1	0	0	0	0	2cm*1.2cm*0.5cm	46.2259	2011-05-10	2015-03-17	alive	A	G	GA	AG	T	G	G	G	0	1		1
W3425	430262A	711	2	75	2	1	0	0	3	1	2	0	0	0	0	6.5*4.5*1.5	46.2259	2013-01-04	2016-11-11	alive	A	A	A	A	CT	GA	GT	G	0	2	1	1
W2686	406318A	600	2	68	1	1	1	0	1	1	1	0	0	0	0	1.2cm*1cm*0.5cm	46.3573	2012-04-20	2016-03-01	alive	AG	GA	A	AG	CT	G	9	GA	0	2	1	1
W3918	455246A	438	1	56	1	2	0	0	3	2	3	0	0	0	0	4.5*3*0.7	46.423	2013-08-27	2017-07-10	alive	AG	GA	GA	A	T	GA	GT	GA	0	1	1	3
W1755	361465A	424	2	58	1	1	0	0	1	0	1	0	0	0	0	0.6cm*0.5cm*0.5cm	46.7515	2011-04-13	2015-03-06	lost to follow-up	AG	G	GA	AG	T	G	GT	G	0	1	0	1
W3618	439884A	740	1	58	1	2	1	1	1	0	1	1	1	0	0	3*2.5*1.2	46.7844	2013-04-12	2017-03-06	alive	A	A	G	A	CT	GA	GT	G	0	1	0	2
W2733	409675A	615	1	71	1	2	0	1	3	1	2	1	1	0	1	4.5cm*3.5cm*1cm	46.7844	2012-05-15	2016-04-08	lost to follow-up	AG	G	GA	A	T	GA	GT	G	0	2	1	1
W3515	434390A	722	1	63	1	2	1	1	3	1	2	0	0	0	1	3.3*2.7*0.6	46.8501	2013-02-20	2017-01-16	alive	AG	G	A	AG	T	G	T	G	0	2	0	1
W3508	434878A	720	1	66	1	1	0	0	3	0	2	0	0	0	1	3.8*3*2	46.883	2013-02-19	2017-01-16	alive	A	GA	A	AG	CT	GA	GT	G	0	2	0	3
W1504	350305A	377	1	81	1	2	1	0	3	1	2	1	1	0	0	4.5×3×1.2	46.883	2010-12-28	2014-11-24	alive	AG	G	GA	AG	T	9	9	GA	0	2	1	1
W1498	350003A	375	1	71	2	2	1	1	3	2	3	1	0	0	0	8×5×2	47.0144	2010-12-24	2014-11-24	death	AG	GA	A	A	T	G	T	GA	1	2	0	3
W3590	438423A	735	2	69	1	2	0	1	3	0	2	0	0	0	0	2*1*0.5	47.1786	2013-03-28	2017-03-03	alive	A	G	A	AG	CT	G	GT	G	0	2	1	1
W3588	438971A	734	1	50	2	1	0	0	1	0	1	1	0	0	0	5*3.5*1.5	47.1786	2013-03-28	2017-03-03	alive	A	G	GA	A	T	GA	GT	G	0	1	0	1
W3586	438326A	733	1	58	1	1	0	0	1	0	1	0	0	0	0	3*1.8*0.5	47.2115	2013-03-27	2017-03-03	alive	A	G	A	A	T	G	GT	G	0	1	0	1
W2786	413625A	622	2	74	2	2	1	1	3	3	3	0	1	0	0	5cm*4.2cm*1cm	47.2772	2012-06-28	2016-06-06	alive	A	G	A	A	T	GA	GT	G	0	2	1	1
W2787	410938A	623	1	65	2	1	1	1	4	3	3	1	0	0	0	5.5cm*5.5cm*2cm	47.3101	2012-05-31	2016-05-10	lost to follow-up	A	GA	A	G	CT	G	T	G	0	2	1	1
W3569	437006A	728	1	79	1	1	0	1	3	0	2	0	1	0	0	3.2*1.8*0.9	47.5072	2013-03-18	2017-03-03	alive	A	GA	GA	A	CT	G	GT	G	0	2	1	1
W3638	441040a	741	1	45	1	2	1	1	2	3	3	1	1	0	1	4*3*1.2	47.7043	2013-04-19	2017-04-10	alive	A	GA	GA	A	C	GA	GT	G	0	1	1	1
W3481	432694A	718	1	68	2	2	1	0	2	0	1	0	0	0	0	7.5*5.5*1.5	47.7043	2013-01-25	2017-01-16	alive	A	GA	A	AG	T	GA	GT	G	0	2	0	1
W3548	436423A	725	1	64	1	2	1	1	4	2	3	0	0	0	0	3.5*2.5*1	47.8357	2013-03-08	2017-03-03	alive	A	GA	G	A	T	GA	9	G	0	2	1	2
W3721	445792A	549	1	55	2	2	1	1	3	1	2	0	0	0	0	6*3.5*2	47.9343	2013-06-08	2017-06-06	alive	AG	GA	A	AG	T	G	T	GA	0	1	1	1
W2541	399029A	795	2	55	2	2	1	1	3	3	3	0	0	0	0	6.1cm*5.6cm*0.8cm	47.9671	2012-03-02	2016-03-01	death	A	G	A	G	CT	A	G	G	1	1		1
W3707	445361a	618	1	56	1	1	1	0	2	1	2	0	0	0	1	1.5*1*0.3	48.0329	2013-06-05	2017-06-06	alive	A	G	GA	A	T	G	GT	G	0	1	1	1
W2204	381859A	520	1	61	1	1	0	0	3	0	2	0	1	0	1	4.5cm*2.5cm*1.8cm	48.0329	2011-10-09	2015-10-10	lost to follow-up	A	G	A	G	T	GA	GT	G	0	2	0	1
W3709	445546A	603	1	63	1	2	1	0	3	2	3	1	0	0	1	3*2.5*2.5	48.0329	2013-06-05	2017-06-06	alive	AG	GA	GA	AG	CT	A	GT	G	0	2	0	1
W1207	335727A	304	2	49	1	2	1	0	2	1	2	0	1	0	0	2×1.5×1	48.0657	2010-07-29	2014-07-31	death	A	G	A	A	T	GA	GT	G	1	1	1	1
W3889	453225A	391	1	61	1	2	0	0	1	2	2	0	0	0	0	2*0.8*0.2	48.0657	2013-08-14	2017-08-16	alive	AG	A	G	A	T	G	GT	G	0	2	1	1
W3874	452795A	482	1	69	1	2	1	1	3	1	2	0	0	0	0	4.5*4*2.5	48.1314	2013-08-12	2017-08-16	alive	AG	A	GA	A	CT	G	GT	G	0	2	0	3
W3451	431830A	715	2	63	2	2	0	0	3	0	2	0	0	0	0	11*7*0.8	48.1643	2013-01-11	2017-01-16	alive	G	GA	A	A	C	GA	9	A	0	2	1	1
W3435	430629A	713	1	40	1	2	0	1	4	1	3	0	0	0	1	4.5*3*1.2	48.3285	2013-01-06	2017-01-16	alive	9	GA	A	9	T	9	GT	9	0	1	1	1
W2503	397210A	568	1	65	2	2	1	1	4	3	3	0	0	0	0	6cm*4.5cm*0.7cm	48.3285	2012-02-20	2016-03-01	alive	A	G	GA	AG	CT	GA	GT	G	0	2	1	1
W3427	430334A	712	1	45	1	2	0	1	2	0	1	0	0	0	0	3.5*2.5*0.5	48.3614	2013-01-05	2017-01-16	alive	A	A	A	AG	CT	G	T	G	0	1	0	1
W1968	370956A	467	1	51	2	1	1	1	3	1	2	1	0	0	0	8.5cm*6cm*1.1cm	48.4271	2011-07-01	2015-07-14	death	A	GA	A	A	CT	A	GT	G	1	1	0	1
W1246	337438A	687	1	75	2	2	1	1	3	2	3	1	1	0	0	6×4×1	48.4271	2010-08-18	2014-08-31	death	AG	GA	A	A	CT	GA	GT	GA	1	2	0	1
W2474	396329A	566	1	68	1	2	1	0	2	1	2	1	1	0	1	2.5cm*1cm*0.5cm	48.5257	2012-02-14	2016-03-01	alive	AG	G	A	AG	CT	GA	GT	G	0	2	0	1
W3836	451160A	493	1	63	1	2	1	1	3	2	3	0	1	0	0	3.5*2.7*0.5	48.6899	2013-07-25	2017-08-15	alive	A	GA	GA	AG	CT	GA	GT	G	0	2	1	1
W1730	360336A	420	1	74	1	2	1	0	3	0	2	0	1	0	0	2.5cm*2cm*1cm	48.9528	2011-04-01	2015-04-30	death	A	G	GA	AG	CT	A	GT	G	1	2	0	2
W2504	398328A	569	1	59	1	2	1	1	4	3	3	0	1	1	1	3cm*3cm*1cm	49.0842	2012-02-27	2016-03-31	death	AG	9	GA	A	CT	GA	GT	9	1	1	1	1
W3699	445252A	716	1	54	2	2	0	1	3	1	2	0	0	0	0	7.5*4.5*2	49.1828	2013-06-04	2017-07-10	alive	A	G	GA	A	CT	GA	GT	G	0	1	0	1
W2423	393613A	559	1	51	1	1	0	0	1	0	1	1	1	0	0	3cm*2.5cm	49.6756	2012-01-10	2016-03-01	alive	AG	GA	G	A	T	G	GT	G	0	1	1	3
W2422	393650A	790	1	55	1	2	1	1	4	3	3	0	0	0	1	4cm*3cm*0.3cm	49.8727	2012-01-10	2016-03-07	lost to follow-up	A	GA	A	G	C	G	GT	G	0	1		1
W1100	329906A	271	1	90	2	2	0	0	2	0	1	0	0	0	0	5×3×1.2	49.9055	2010-06-03	2014-07-31	death	A	GA	GA	A	T	G	T	G	1	2	0	1
W1831	364819A	441	2	77	2	1	1	0	1	3	2	0	0	0	0	5.5cm*3cm*1cm	49.9384	2011-05-12	2015-07-10	death	A	A	A	G	T	GA	G	G	1	2	0	1
W1763	362882A	428	1	78	1	1	1	1	3	2	3	0	0	0	0	2.5cm*2cm*1.2cm	50.3655	2011-04-25	2015-07-06	lost to follow-up	AG	GA	A	A	CT	A	G	G	0	2	1	1
W1349	343052A	338	1	77	2	1	1	0	2	2	2	0	0	0	0	10×9×5	50.5298	2010-10-15	2014-12-31	death	A	GA	A	AG	CT	G	GT	G	1	2	0	1
W1250	338089A	317	1	56	1	2	1	1	3	1	2	1	0	1	0	2×2×0.8	51.0554	2010-08-23	2014-11-24	alive	AG	G	A	AG	T	GA	G	GA	0	1	1	2
W2337	388404A	548	1	55	2	2	1	1	3	3	3	1	1	0	0	5cm*4.5cm*0.8cm	51.0554	2011-11-29	2016-03-01	alive	G	A	9	G	9	9	9	9	0	1	1	1
W1247	337593A	316	2	66	1	1	0	0	1	0	1	0	0	0	0	2.5×1.5×1	51.2197	2010-08-18	2014-11-24	death	A	G	A	A	T	G	9	G	1	2		1
W2321	386989A	546	1	64	2	2	1	0	3	2	3	0	0	0	0	5.6cm*4cm*1.2cm	51.2526	2011-11-23	2016-03-01	alive	A	G	A	G	T	GA	GT	G	0	2	1	1
W1767	362326A	765	1	62	1	2	1	1	3	1	2	0	0	0	0	2.5cm*2cm*1.8cm	51.8111	2011-04-20	2015-08-14	death	A	A	GA	A	T	A	G	G	1	2		1
W2255	383576A	780	1	63	1	1	0	0	1	0	1	0	0	0	0	3cm*1.3cm	52.1396	2011-10-27	2016-03-01	alive	A	A	GA	AG	T	G	GT	G	0	2		1
W2250	384096A	530	1	43	1	2	0	0	2	0	1	1	0	0	0		52.2053	2011-10-25	2016-03-01	alive	A	GA	A	G	CT	GA	9	G	0	1	1	2
W0842	314514	211	1	58	1	1	1	1	3	1	2	0	0	0	1	4.5*3.3*0.8	52.4682	2009-12-15	2014-04-30	death	A	GA	GA	AG	T	GA	GT	G	1	1	1	1
W1167	333564A	293	1	35	2	2	0	0	3	1	2	1	0	0	1	5x4x1.5	52.5339	2010-07-09	2014-11-24	death	A	GA	A	G	CT	GA	GT	G	1	1	1	1
W2217	381935A	521	1	52	1	1	0	0	1	0	1	1	1	1	0	0.7cm*0.3cm	52.6653	2011-10-11	2016-03-01	alive	A	G	A	G	T	GA	GT	G	0	1	1	1
W2296	385373A	541	1	63	2	2	0	1	3	3	3	0	0	0	1	5cm*4cm*1.6cm	52.8953	2011-11-11	2016-04-08	lost to follow-up	A	GA	A	A	T	A	9	G	0	2	0	3
W3132	420508A	35	1	43	1	1	1	1	4	3	3	0	0	0	1	3.3cm*2cm*1.5cm	53.6181	2012-09-11	2017-03-01	death	A	GA	A	A	T	GA	GT	G	1	1		1
W2154	378496A	508	1	57	2	2	0	0	3	0	2	0	0	0	0	13.5cm*10cm*1cm	53.7823	2011-09-07	2016-03-01	alive	AG	GA	A	G	T	G	T	GA	0	1	1	3
W2681	405936A	599	2	77	1	2	0	0	1	0	1	0	0	0	0	2cm*1.5cm*0.7cm	54.4394	2012-04-19	2016-11-01	alive	A	GA	G	A	T	GA	GT	G	0	2	0	1
W1055	327801A	257	1	60	1	2	0	1	3	0	2	1	1	0	0	4*2.5*1.5	54.4723	2010-05-11	2014-11-24	alive	A	G	A	AG	T	GA	GT	9	0	2	1	1
W1056	327676A	258	1	66	1	2	1	1	3	1	2	0	1	0	1	3.2*2.8*0.7	54.4723	2010-05-11	2014-11-24	death	A	GA	A	AG	T	GA	GT	G	1	2	1	1
W1040	326968A	252	1	81	2	2	1	0	3	0	2	0	0	0	0	9*7*2	54.6694	2010-05-05	2014-11-24	alive	A	G	A	AG	T	GA	GT	G	0	2	1	1
W1030	326414A	247	2	52	1	1	0	0	1	0	1	0	0	0	0	粘膜改变区面积2*1.5	54.8337	2010-04-30	2014-11-24	alive	AG	G	A	A	T	G	9	GA	0	1	0	1
W1025	326358A	244	2	75	1	2	1	0	3	2	3	0	0	0	0	2.5*2*1	54.8994	2010-04-28	2014-11-24	alive	A	GA	GA	AG	T	GA	GT	G	0	2	1	1
W1006	325663A	239	1	71	2	2	0	0	3	0	2	0	0	0	0	6*6*1.5	55.2936	2010-04-16	2014-11-24	alive	A	G	GA	A	CT	G	T	G	0	2	0	1
W0887	317470	744	2	33	2	2	1	1	4	1	3	0	0	0	1	cm×7cm×4cm	55.3593	2010-01-19	2014-08-31	death	AG	G	GA	A	T	A	G	G	1	1		1
W2008	372907A	773	1	51	1	1	1	1	3	1	2	1	1	0	0	4cm*3.5cm*0.6cm	55.3922	2011-07-20	2016-03-01	alive	A	GA	A	AG	T	G	T	G	0	1		1
W2960	415814A	652	2	47	1	1	1	1	4	2	3	0	0	0	1	4cm*2.9cm*0.7cm	55.3922	2012-07-18	2017-02-28	death	A	G	A	G	T	GA	G	G	1	1	1	1
W1996	372678A	474	2	38	1	2	1	0	1	1	1	0	0	0	0	3.5cm*3cm	55.6222	2011-07-13	2016-03-01	alive	A	G	GA	A	CT	G	GT	G	0	1	1	2
W1397	344794A	350	2	64	1	2	1	0	2	1	2	0	0	1	1	4×3.5×0.8	55.7207	2010-11-03	2015-06-26	lost to follow-up	A	G	A	A	T	A	GT	G	0	2	1	3
W1621	356060A	403	2	67	1	1	0	0	1	0	1	0	1	0	0	直径0.4	56.2136	2011-03-01	2015-11-06	lost to follow-up	A	GA	A	AG	CT	GA	GT	G	0	2	1	1
W1928	369309A	461	1	47	1	2	1	0	3	3	3	1	1	0	0	4cm*2.5cm*1.5cm	56.3778	2011-06-20	2016-03-01	death	AG	G	A	A	T	G	GT	GA	1	1	1	1
W0923	320167A	228	2	67	2	1	1	0	2	1	2	0	0	0	0	5*3*1	57.0021	2010-02-23	2014-11-24	alive	G	G	GA	AG	T	G	T	A	0	2	1	1
W2630	404341A	592	1	73	2	2	1	1	3	0	2	0	0	0	0	7cm*4.5cm*0.8cm	57.2649	2012-04-09	2017-01-16	alive	A	A	GA	A	CT	G	GT	G	0	2	1	1
W2622	403602A	591	1	57	1	1	0	0	1	2	2	0	0	0	0	1cm*0.7cm*0.3cm	57.6263	2012-03-29	2017-01-16	alive	A	GA	A	A	CT	G	GT	G	0	1	1	1
W2709	407786A	606	2	55	2	2	0	0	2	1	2	0	1	0	1	5.5cm*4cm*0.9cm	57.9548	2012-05-04	2017-03-03	alive	AG	G	G	A	T	A	GT	G	0	1	0	1
W2586	401093A	587	2	70	1	1	0	0	3	2	3	0	0	0	0	4.7cm*3.6cm*0.7cm	58.0534	2012-03-16	2017-01-16	alive	AG	GA	A	AG	T	A	GT	G	0	2	1	1
W2706	407369A	604	1	53	2	2	1	1	3	1	2	0	1	0	0	8cm*7.5cm*1.5cm	58.152	2012-04-28	2017-03-03	alive	A	G	A	G	T	A	GT	G	0	1	1	1
W2574	401748A	585	1	55	1	1	1	0	1	0	1	0	0	0	0	3cm*2.5cm*0.5cm	58.152	2012-03-13	2017-01-16	alive	A	G	GA	AG	T	GA	GT	G	0	1	1	1
W2573	401650A	584	1	49	1	2	0	1	3	2	3	0	1	0	1	2.5cm*1.8cm*1.2cm	58.152	2012-03-13	2017-01-16	alive	AG	GA	A	G	C	GA	GT	GA	0	1	1	1
W3114	419744A	671	1	65	1	2	1	1	3	1	2	0	1	0	1	4.5cm*4cm*1.2cm	58.2834	2012-08-31	2017-07-10	alive	A	GA	A	AG	CT	GA	GT	G	0	2	1	3
W2568	401447A	583	2	46	1	2	1	1	4	3	3	0	0	0	1	4.5cm*3.5cm*1cm	58.2834	2012-03-09	2017-01-16	alive	AG	G	A	AG	T	GA	GT	GA	0	1	1	1
W2560	400785A	582	2	57	1	2	1	0	1	0	1	0	0	0	0	2.5cm*1.5cm*0.4cm	58.3162	2012-03-08	2017-01-16	alive	AG	A	A	A	CT	G	GT	GA	0	1	0	2
W3104	419360A	669	1	49	2	2	0	0	3	0	2	1	1	0	1	5.5cm*2.5cm*1.5cm	58.3491	2012-08-29	2017-07-10	alive	AG	GA	GA	A	T	G	T	GA	0	1	1	1
W2547	400976A	579	1	60	1	2	0	0	1	2	2	0	1	0	1	3cm*2.5cm*0.5cm	58.3819	2012-03-06	2017-01-16	alive	A	G	A	AG	CT	GA	G	G	0	2	1	2
W2548	400786A	580	2	57	1	2	0	0	2	0	1	0	0	0	0	4.3cm*4cm*0.6cm	58.3819	2012-03-06	2017-01-16	alive	A	GA	A	A	T	GA	GT	G	0	1	1	1
W3092	419893A	668	2	46	2	2	0	0	1	0	1	0	0	0	0	5.5cm*1.6cm	58.3819	2012-08-28	2017-07-10	alive	A	GA	A	A	T	G	T	G	0	1	1	2
W2394	391714A	557	2	62	1	2	0	0	3	0	2	0	0	0	1	2.8cm*2cm*0.8cm	58.3819	2011-12-29	2016-11-09	alive	A	A	A	AG	T	G	T	G	0	2	1	1
W2687	406393A	601	1	59	1	2	0	0	3	1	2	0	1	0	1	2.2cm*2.2cm*1cm	58.4148	2012-04-20	2017-03-03	alive	A	GA	GA	A	T	GA	GT	G	0	1	1	1
W2677	405818A	597	1	68	2	1	1	1	4	1	3	0	0		0	6.5cm*5.5cm*1.5cm	58.4805	2012-04-18	2017-03-03	alive	AG	G	GA	A	CT	A	G	G	0	2	1	1
W2542	399086A	578	2	63	2	2	1	0	3	2	3	0	0	0	1	7.5cm*5.5cm*1.5cm	58.5133	2012-03-02	2017-01-16	alive	A	G	A	AG	CT	GA	GT	G	0	2	0	1
W0170	282345	77	1	45	2	2	1	0	3	2	3	1	1	0	1	7*5*2.5	58.5133	2008-11-28	2013-10-14	death	A	GA	A	AG	T	A	9	G	1	1	1	1
W2537	399970A	577	1	62	1	1	0	0	1	0	1	0	0	0	0	3.2cm*2.5cm*0.6cm	58.5462	2012-03-01	2017-01-16	alive	A	G	GA	AG	T	A	G	G	0	2	1	1
W3082	418870A	666	1	43	1	1	0	1	4	0	3	1	1	0	0	4cm*3cm*1cm	58.5462	2012-08-23	2017-07-10	alive	A	GA	A	AG	T	GA	GT	G	0	1	0	1
W3420	430146A	710	1	81	1	1	1	0	1	0	1	0	0	0	0	1.7*1.2*0.7	58.5462	2012-12-28	2017-11-14	alive	G	GA	GA	AG	T	A	G	A	0	2	1	1
W3076	418699A	665	1	65	1	2	0	1	3	0	2	1	0	0	0	4.5cm*3.8cm*0.3cm	58.5791	2012-08-22	2017-07-10	alive	A	G	GA	A	T	GA	GT	G	0	2	1	2
W2760	410199A	620	1	56	2	2	1	1	4	3	3	1	0	0	1	10cm*6cm	58.5791	2012-05-23	2017-04-10	alive	A	GA	GA	A	T	GA	GT	G	0	1	1	1
W1758	361836A	425	2	62	1	1	0	0	1	0	1	0	0	0	0	0.3cm*0.3cm	58.5791	2011-04-14	2016-03-01	alive	AG	GA	A	A	C	GA	T	GA	0	2	1	1
W2732	409770A	614	1	47	1	2	1	1	2	0	1	0	1	0	0	4.5cm*3cm*1cm	58.7433	2012-05-18	2017-04-10	alive	AG	GA	GA	AG	T	GA	GT	G	0	1	1	1
W2729	409107A	613	1	63	1	2	0	0	1	0	1	1	1	0	0	1.2*0.8cm和2*0.8cm	58.8747	2012-05-14	2017-04-10	alive	A	GA	A	AG	T	GA	GT	G	0	2	1	1
W2678	406121A	598	2	49	1	2	1	1	3	2	3	0	0	0	0	2cm*1.5cm*1cm	58.9405	2012-04-18	2017-03-17	alive	A	GA	G	A	T	A	G	G	0	1	1	1
W0305	287764	92	1	67	1	1	0	1	3	1	2	0	0	0	1	4.5*3*1	58.9405	2009-02-16	2014-01-15	lost to follow-up	AG	G	A	A	T	GA	GT	G	0	2	0	1
W2726	409186A	612	1	55	1	2	0	0	1	1	1	1	1	0	0	2cm*1.5cm	58.9733	2012-05-11	2017-04-10	alive	AG	GA	A	AG	T	GA	GT	GA	0	1	0	1
W3018	417153A	32	1	64	2	2	0	0	3	0	2	1	1	0	1	8cm*6cm*1.5cm	59.0062	2012-08-06	2017-07-07	alive	A	GA	GA	A	CT	GA	GT	G	0	2		1
W2723	408632A	611	1	55	2	2	1	0	2	0	1	1	1	0	0	5cm*4cm*0.7cm	59.0062	2012-05-10	2017-04-10	alive	A	GA	GA	AG	CT	GA	GT	G	0	1	0	1
W1734	360178A	421	1	50	1	2	0	0	2	0	1	0	1	0	0	2cm*1.7cm*1cm	59.0062	2011-04-01	2016-03-01	alive	AG	GA	GA	AG	CT	A	GT	G	0	1	0	1
W3371	428543A	704	1	55	2	1	1	1	3	1	2	0	0	0	1	5cm*4cm*1cm	59.0719	2012-12-12	2017-11-14	alive	AG	G	GA	AG	T	G	T	GA	0	1	0	1
W1717	359619A	417	2	45	1	2	1	1	3	1	2	0	0	0	0	3cm*2cm*1.2cm	59.1047	2011-03-29	2016-03-01	alive	AG	G	GA	A	T	A	9	G	0	1	0	1
W2793	411079A	625	1	66	1	2	0	0	1	0	1	1	1	0	0	4cm*2.5cm*0.8cm	59.2033	2012-06-01	2017-05-08	alive	A	GA	A	A	T	G	GT	G	0	2	1	1
W1732	360109A	763	1	59	2	1	1	0	3	0	2	0	0	0	1	5cm*4cm*1.2cm	59.2033	2011-04-01	2016-03-07	lost to follow-up	G	G	A	AG	CT	GA	GT	G	0	1		1
W3362	428134A	703	1	60	1	2	0	1	3	1	2	0	1	0	1	4cm*3.5cm*1cm	59.2361	2012-12-07	2017-11-14	alive	AG	A	A	A	T	GA	GT	GA	0	2	1	1
W3264	424872A	684	2	62	2	2	1	1	4	3	3	0	0	0	0	5.5cm*5cm*2cm	59.2361	2012-11-02	2017-10-10	alive	AG	GA	A	AG	T	G	T	GA	0	2	0	1
W2978	416312A	31	2	66	1	2	1	1	3	3	3	0	0	0	1	2.8cm*1.8cm*0.4cm	59.3676	2012-07-26	2017-07-07	alive	A	G	A	AG	T	GA	G	G	0	2		1
W3256	424391A	43	1	73	2	2	0	1	3	0	2	1	1	0	0	5cm*4cm*1.5cm	59.3676	2012-10-29	2017-10-10	alive	A	GA	A	A	T	A	GT	G	0	2		1
W2974	416183A	30	1	70	1	2	0	0	2	0	1	0	1	0	1	4cm*3.7cm*0.2cm	59.4004	2012-07-25	2017-07-07	alive	AG	G	A	A	T	GA	GT	GA	0	2		2
W3111	419745A	670	1	54	1	2	0	0	1	0	1	0	0	0	0	0.8cm*0.7cm	59.4661	2012-08-31	2017-08-15	alive	G	GA	A	A	T	G	T	GA	0	1	0	1
W2761	410421A	621	1	61	1	1	1	1	1	1	1	0	0	0	0	3.5cm*2cm	59.499	2012-05-23	2017-05-08	alive	A	GA	GA	A	CT	9	GT	G	0	2	0	3
W2876	413300A	631	2	41	1	2	0	0	2	0	1	0	0	0	0	1.8cm*1.2cm*0.3cm	59.499	2012-06-21	2017-06-06	alive	AG	G	A	AG	CT	G	9	GA	0	1	0	1
W0829	313784	210	2	86	1	1	1	1	3	1	2	0	0	0	0	3*2.5*1	59.5647	2009-12-07	2014-11-24	alive	A	A	A	A	T	G	T	G	0	2	0	1
W3058	418419A	660	2	57	2	1	1	1	4	3	3	0	0	0	1	7cm*5cm*1.8cm	59.6304	2012-08-20	2017-08-09	alive	A	G	A	AG	T	G	T	G	0	1	1	1
W3326	426728A	696	1	56	2	2	1	1	3	1	2	0	1	0	1	5.5cm*5cm*0.6cm	59.6961	2012-11-23	2017-11-14	alive	A	GA	A	AG	T	GA	GT	G	0	1	1	1
W3318	426595A	693	1	55	1	2	1	1	4	1	3	0	1	0	0	4.5cm*4cm*1cm	59.729	2012-11-22	2017-11-14	alive	AG	G	GA	A	T	A	GT	G	0	1	0	1
W2840	412266A	26	1	53	2	2	1	1	3	3	3	0	0	0	1	9.5cm*6.5cm*1.6cm	59.7618	2012-06-13	2017-06-06	alive	AG	GA	A	A	T	A	GT	GA	0	1		1
W2945	415531A	649	1	57	2	2	1	0	3	1	2	0	0	0	1	5.5cm*4cm*0.8cm	59.7947	2012-07-13	2017-07-07	alive	A	GA	GA	A	T	GA	GT	G	0	1	1	1
W2829	412908A	627	2	49	1	2	0	0	1	0	1	0	0	0	0	3cm*3cm*1.4cm	59.7947	2012-06-12	2017-06-06	alive	A	GA	A	AG	T	GA	GT	G	0	1	0	1
W2939	415057A	645	1	53	1	2	1	1	3	3	3	0	1	0	1	4.2cm*4cm*1cm	59.7947	2012-07-13	2017-07-07	alive	A	G	A	G	T	GA	GT	G	0	1		3
W2938	415384A	644	1	63	1	1	1	0	2	0	1	1	1	0	0	4cm*2cm*0.7cm	59.8275	2012-07-12	2017-07-07	alive	AG	G	GA	AG	T	G	GT	GA	0	2	1	3
W2927	414980A	642	1	59	1	1	0	0	1	0	1	1	1	0	0	1.2cm*0.7cm*0.5cm	59.8932	2012-07-10	2017-07-07	alive	A	GA	A	A	T	A	G	G	0	1	1	1
W3300	426071A	690	2	38	2	2	1	1	4	1	3	0	0	0	1	7.8cm*5.5cm*1.8cm	59.8932	2012-11-16	2017-11-13	alive	A	G	GA	AG	T	A	GT	G	0	1	0	1
W3200	422981A	675	1	62	1	2	1	1	3	0	2	1	1	0	0	3cm*2.4cm*0.7cm	59.9261	2012-10-11	2017-10-09	alive	A	GA	A	G	CT	G	GT	G	0	2	1	1
W1633	356662A	407	1	51	2	2	1	1	3	1	2	0	0	0	1	5*3*1	59.9261	2011-03-04	2016-03-01	alive	A	G	A	AG	T	G	GT	G	0	1	0	1
W3143	420844A	37	1	80	2	1	0	0	3	1	2	0	0	0	0	8cm*6.5cm*2.5cm	59.9261	2012-09-14	2017-09-12	alive	A	GA	GA	A	T	GA	GT	G	0	2		1
W2279	385372A	536	1	42	1	2	0	0	3	2	3	1	1	0	1	1.7cm*1.3cm*0.5cm	60.0575	2011-11-08	2016-11-09	alive	AG	GA	GA	A	CT	GA	GT	GA	0	1	1	2
W2905	414024A	638	1	59	2	2	1	1	4	2	3	1	1	0	1	6.5cm*6.3cm*1.2cm	60.1232	2012-07-03	2017-07-07	alive	AG	GA	A	G	T	A	GT	G	0	1	1	3
W2640	404983A	593	2	37	1	2	1	0	1	3	2	0	0	0	1	4.5cm*3.3cm*0.9cm	60.1232	2012-04-06	2017-04-10	alive	AG	G	GA	A	T	G	GT	G	0	1	1	2
W1584	354223A	395	2	52	1	1	1	1	3	1	2	0	0	0	0	3*2.5*1	60.5175	2011-02-14	2016-03-01	alive	A	GA	A	G	CT	G	T	G	0	1	1	1
W0643	303926	167	1	73	2	1	0	1	3	1	2	0	1	0	1	6*5*1.5	60.846	2009-08-06	2014-09-01	death	AG	GA	GA	AG	T	G	GT	GA	1	2	1	1
W1574	353526A	393	1	47	1	1	0	1	3	0	2	0	0	0	1	3*2.5*1.3	61.0103	2011-01-30	2016-03-01	alive	A	GA	A	A	T	GA	GT	G	0	1	1	1
W0735	309416	191	1	59	1	1	1	1	3	1	2	0	0	1	1	4*4*2	61.3388	2009-10-14	2014-11-24	alive	A	GA	A	AG	T	A	G	G	0	1	1	1
W2843	412553A	629	1	62	1	1	0	0	1	0	1	1	1	0	0	最大径0.5cm	61.8316	2012-06-14	2017-08-09	alive	AG	G	A	A	T	GA	GT	GA	0	2	0	1
W1131	331792A	279	1	57	2	1	0	0	3	0	2	0	1	0	1	5x4.5x1	62.2259	2010-06-24	2015-08-31	death	A	A	A	A	CT	G	T	G	1	1	1	1
W2406	391569A	19	1	46	2	2	1	1	4	1	3	0	0	0	0	8.5cm*6.5cm*2.5cm	63.4086	2011-12-28	2017-04-10	alive	A	A	GA	AG	T	GA	GT	G	0	1		1
W0468	295647	119	1	62	1	1	0	0	1	0	1	0	1	1	0	1.7	63.8029	2009-05-12	2014-09-05	lost to follow-up	A	A	GA	A	CT	GA	G	G	0	2	0	1
W2175	380028A	514	1	56	1	2	1	0	1	3	2	1	1	0	1	3.8cm*1.5cm	63.9014	2011-09-20	2017-01-16	alive	A	GA	GA	A	CT	A	GT	G	0	1	1	2
W1384	344125A	347	2	55	1	1	1	0	3	1	2	0	0	0	0	4×4×0.8	63.9671	2010-11-01	2016-03-01	alive	AG	G	GA	A	T	G	T	GA	0	1	1	1
W0624	302903	160	1	35	1	2	0	0	3	0	2	1	1	0	1	1.8*1.8*0.5	64.0329	2009-07-24	2014-11-24	death	A	G	GA	A	T	GA	GT	G	1	1	1	1
W1946	370293A	769	1	48	2	2	1	1	3	2	3	0	1	0	0	6cm*4cm*1.5cm	64.2957	2011-06-24	2016-11-01	death	A	GA	GA	A	T	A	G	G	1	1		1
W0578	300950	150	2	53	1	2	1	1	3	1	2	0	0	0	1	3*2.5*1	64.5914	2009-07-07	2014-11-24	alive	A	GA	A	A	C	GA	GT	G	0	1	1	1
W1355	342717A	341	1	51	1	2	0	1	3	0	2	1	1	0	0	3×2×0.5	64.5914	2010-10-13	2016-03-01	alive	AG	G	A	A	T	A	G	GA	0	1	1	1
W0479	296564	122	1	55	2	1	0	0	3	0	2	1	1	0	0	7.5*5.5*1.2	64.8871	2009-05-21	2014-10-17	death	A	GA	A	A	T	G	T	G	1	1	1	1
W0555	300003	145	1	64	2	2	1	1	3	0	2	1	0	0	1	6*4.5*1.5	65.0185	2009-06-24	2014-11-24	alive	AG	GA	GA	A	CT	GA	GT	GA	0	2	1	1
W1709	359254A	762	1	58	1	2	1	0	2	0	1	0	0	0	0	2.5*2.1.3	65.2813	2011-03-25	2016-09-01	alive	A	GA	GA	AG	T	G	G	G	0	1		2
W0521	298422	133	1	51	1	2	1	0	3	2	3	1	1	0	1	4.5*3*1	65.4784	2009-06-10	2014-11-24	lost to follow-up	A	GA	GA	A	T	A	G	G	0	1	1	1
W0489	296993	128	1	48	2	1	1	0	3	1	2	1	1	0	0	6*4.5*1.2	65.6756	2009-05-26	2014-11-15	death	A	GA	A	AG	T	G	T	G	1	1	1	1
W0487	296672	126	1	58	1	2	1	0	2	0	1	0	0	0	1	4*2*0.7	65.7084	2009-05-21	2014-11-11	death	AG	G	A	AG	CT	G	T	GA	1	1	1	1
W1201	335598A	301	1	43	1	2	1	0	3	1	2	1	1	0	0	3×2×1	67.1211	2010-07-28	2016-03-01	alive	A	G	A	AG	T	G	T	G	0	1	0	2
W1192	334690A	300	2	35	2	1	1	1	3	2	3	0	0	0	1	7.5×4.5×1.3	67.3511	2010-07-21	2016-03-01	death	AG	GA	GA	AG	T	A	G	G	1	1	1	1
W1180	333913A	297	1	60	1	2	0	1	3	0	2	0	1	0	0	1x1x0.5	67.5811	2010-07-14	2016-03-01	alive	A	G	A	A	CT	GA	GT	G	0	2	1	1
W1981	371290A	8	2	67	2	2	1	1	3	3	3	0	0	0	1	9cm*7cm*3.5cm	67.8439	2011-07-06	2017-03-01	alive	A	G	A	A	T	G	GT	G	0	2		1
W0388	291459	104	2	56	1	2	0	0	3	0	2	0	0	0	0	4*4*1	67.9754	2009-03-26	2014-11-24	alive	AG	A	A	A	CT	G	T	GA	0	1	1	1
W0371	290625	99	2	53	2	2	1	0	3	1	2	0	0	0	1	7*7*1.5	68.2382	2009-03-18	2014-11-24	alive	A	G	A	A	CT	G	T	G	0	1	1	2
W1125	331592A	277	1	49	1	2	1	0	3	3	3	0	0	0	0	4.5x3.6x0.4	68.3039	2010-06-22	2016-03-01	alive	AG	GA	GA	AG	T	G	T	GA	0	1	1	1
W2526	398721A	574	2	61	1	2	1	1	3	3	3	0	0	0	1	3.6cm*3.5cm*cm	68.4682	2012-02-29	2017-11-13	alive	A	GA	A	AG	T	A	9	G	0	2	0	1
W2520	398722A	573	1	58	2	2	0	0	3	0	2	0	0	0	0	11cm*10cm*1.6cm	68.4682	2012-02-29	2017-11-13	alive	A	GA	A	G	CT	G	T	G	0	1	0	1
W1610	355555A	401	1	50	1	2	1	0	3	1	2	1	1	0	1	2.3*2*1	68.501	2011-02-24	2016-11-09	alive	AG	A	A	A	T	G	T	GA	0	1	1	1
W2519	398892A	572	1	56	1	2	1	1	2	0	1	0	0	0	0	4.2cm*2.9cm*1cm	68.6653	2012-02-23	2017-11-13	alive	AG	GA	GA	A	CT	GA	GT	9	0	1	1	1
W2514	398740A	571	2	55	2	2	1	1	2	1	2	0	0	0	1	6cm*5.3cm*0.5cm	68.6982	2012-02-22	2017-11-13	alive	G	A	A	A	CT	GA	G	G	0	1	0	1
W2469	396107A	22	1	73	2	1	1	0	3	0	2	0	1	0	1	12cm*8cm*2cm	68.9938	2012-02-13	2017-11-13	alive	A	GA	GA	A	CT	GA	GT	G	0	2		3
W2476	395867A	567	1	54	1	1	0	0	3	0	2	0	0	0	0	3cm*3cm*0.5cm	69.0924	2012-02-10	2017-11-13	alive	A	A	A	G	CT	GA	GT	G	0	1	0	1
W2473	395767A	793	1	59	1	2	1	1	2	2	2	1	1	0	0	2.5cm*2cm*0.7cm	69.1253	2012-02-09	2017-11-13	alive	A	GA	GA	A	T	GA	GT	G	0	1		3
W2472	395719A	565	1	41	1	1	0	0	1	0	1	0	0	0	0	1.5cm*1cm*0.4cm	69.1253	2012-02-09	2017-11-13	alive	A	GA	A	AG	T	GA	GT	G	0	1	1	1
W1608	355191A	1	1	52	2	1	1	1	3	3	3	0	0	0	0	7*5*0.8	69.2567	2011-02-22	2016-11-30	alive	A	G	A	9	CT	GA	GT	G	0	1		1
W1982	371436A	471	1	79	2	1	1	1	3	3	3	0	0	0	0	7cm*6cm*1.8cm	69.2895	2011-07-07	2017-04-15	death	A	G	A	AG	T	G	T	G	1	2	0	1
W2459	395058A	563	1	58	1	2	1	0	2	1	2	1	1	0	1	4.5cm*4cm	69.3552	2012-02-02	2017-11-13	alive	A	G	GA	AG	T	GA	GT	G	0	1	0	2
W1082	328656A	265	1	59	1	2	1	1	3	2	3	1	1	1	0	4.5*3.5*1	69.3552	2010-05-21	2016-03-01	death	A	GA	G	A	T	A	G	G	1	1	0	1
W1061	327799A	260	1	66	2	2	1	1	3	2	3	0	0	0	1	6*5*1.5	69.6181	2010-05-13	2016-03-01	alive	AG	G	A	A	CT	G	T	GA	0	2	1	1
W1699	359161A	415	2	50	1	2	0	0	3	1	2	0	0	0	1	4cm*2.3cm*0.8cm	69.8809	2011-03-22	2017-01-16	alive	A	G	A	AG	T	G	GT	G	0	1	0	1
W1036	326811A	250	1	77	1	2	1	1	3	2	3	0	1	0	1	4*4*2	69.9138	2010-05-04	2016-03-01	alive	AG	A	A	AG	T	A	G	G	0	2	1	1
W0264	286271	85	1	57	1	2	0	1	3	3	3	0	0	0	0	4.5*4.5*0.8	70.0452	2009-01-22	2014-11-24	death	AG	G	GA	A	T	GA	GT	G	1	1	1	1
W1031	326502A	248	2	59	1	1	0	0	1	0	1	0	0	0	0	1.2*1*0.5	70.078	2010-04-29	2016-03-01	alive	A	G	GA	A	C	GA	GT	G	0	1	1	1
W1567	357832A	753	2	66	1	1	0	0	1	0	1	0	0	0	0	最大径约0.5cm	70.1109	2011-03-15	2017-01-16	alive	A	G	A	AG	T	GA	GT	G	0	2		1
W1027	326416A	245	1	55	2	2	1	1	3	1	2	1	1	0	0	6*5*1	70.1109	2010-04-28	2016-03-01	alive	A	GA	A	G	T	GA	GT	G	0	1	1	1
W2131	377359A	503	1	69	1	2	0	1	2	0	1	1	1	0	1	2.5cm*2cm*0.6cm	70.2752	2011-08-29	2017-07-07	alive	A	9	GA	AG	T	A	GT	G	0	2	1	1
W1761	362571A	427	1	66	1	1	0	0	1	0	1	0	0	0	0	0.8cm*0.8cm	70.308	2011-04-22	2017-03-01	alive	A	A	GA	AG	T	GA	T	G	0	2	1	1
W1772	362440A	766	1	41	1	2	1	0	1	1	1	0	0	0	0	3cm*2.5cm*1cm	70.3409	2011-04-21	2017-03-01	alive	A	G	GA	AG	T	A	G	G	0	1		1
W1771	362881A	6	2	75	2	2	1	1	3	2	3	0	0	0	1	6cm*5cm*1.5cm	70.3409	2011-04-21	2017-03-01	alive	A	A	GA	A	CT	GA	GT	G	0	2		1
W1650	356955A	2	1	70	2	1	1	1	3	0	2	0	1	0	1	7*5*1.5	70.3409	2011-03-08	2017-01-16	alive	A	GA	GA	A	T	G	T	G	0	2		1
W2132	377364A	504	1	53	1	2	0	0	2	0	1	1	1	0	0	2.5cm*2cm*0.4cm	70.3737	2011-08-26	2017-07-07	alive	A	G	A	A	T	GA	GT	G	0	1	1	1
W2130	377522A	502	1	60	1	2	1	1	4	1	3	0	1	0	1	4cm*3.5cm*0.7cm	70.3737	2011-08-26	2017-07-07	alive	A	GA	GA	AG	T	GA	GT	G	0	2	1	2
W1632	356858A	406	1	60	2	1	1	1	3	1	2	0	1	0	1	7.5*7*1.5	70.3737	2011-03-07	2017-01-16	alive	A	G	A	AG	T	G	T	G	0	2	1	1
W2127	376943A	500	1	62	1	2	0	0	2	0	1	1	0	0	0	3cm*2cm*0.8cm	70.4066	2011-08-25	2017-07-07	alive	A	A	A	AG	T	GA	GT	G	0	2	1	1
W1764	362250A	429	1	55	1	2	1	0	2	2	2	1	1	0	1	2.5cm*2cm*1cm	70.4066	2011-04-19	2017-03-01	alive	A	G	A	AG	T	GA	GT	G	0	1	1	1
W2113	376641A	495	2	62	1	2	0	0	2	0	1	0	0	0	0	1cm*0.8cm*0.5cm	70.4723	2011-08-23	2017-07-07	alive	A	G	A	A	T	GA	GT	G	0	2	1	1
W2114	376808A	496	1	74	1	2	1	0	1	1	1	0	0	0	0	2.5cm*2cm*0.8cm	70.4723	2011-08-23	2017-07-07	alive	AG	G	A	G	T	GA	GT	G	0	2	0	1
W1845	365729A	446	1	60	1	1	1	1	2	0	1	1	1	0	0	1.5cm*1.2cm*0.8cm	70.6366	2011-05-19	2017-04-07	alive	A	GA	GA	A	T	G	GT	G	0	2	1	1
W1858	366923A	447	1	50	1	1	1	1	3	0	2	1	1	0	1	4cm*2.5cm*0.8cm	70.7023	2011-05-20	2017-04-10	alive	A	GA	A	AG	CT	A	T	G	0	1	0	1
W1740	361093A	422	1	63	1	1	0	0	1	0	1	0	0	0	0	0.8cm*0.6cm*0.5cm	70.8008	2011-04-07	2017-03-01	alive	A	GA	A	G	CT	G	GT	G	0	2	1	1
W2385	390522A	18	1	67	1	2	0	1	4	0	3	0	0	0	1	3cm*2.5cm*0.7cm	70.8008	2011-12-20	2017-11-13	alive	AG	GA	GA	A	T	GA	GT	G	0	2		1
W2064	375135A	487	1	59	2	1	1	1	3	1	2	1	1	0	0	6.5cm*6cm*1.8cm	70.9322	2011-08-09	2017-07-07	alive	A	GA	A	G	T	GA	GT	G	0	1	0	1
W1815	364317A	439	1	51	1	2	0	0	1	0	1	0	0	0	0	2.5cm*2cm*0.5cm	70.9651	2011-05-09	2017-04-07	alive	A	A	GA	G	T	GA	GT	G	0	1	1	3
W2369	390375A	554	1	57	2	2	1	1	3	3	3	0	0	0	1	7cm*6cm*1.8cm	70.9979	2011-12-14	2017-11-13	alive	A	GA	A	A	CT	G	GT	G	0	1	0	3
W2367	389548A	787	1	66	1	2	0	0	2	0	1	0	1	0	0	4.5cm*4cm*1.5cm	71.0308	2011-12-13	2017-11-13	alive	A	A	A	A	T	G	T	G	0	2		1
W2063	374906A	486	1	79	1	2	1	0	1	1	1	0	0	0	0	1.2cm*1cm*0.3cm	71.0637	2011-08-05	2017-07-07	alive	AG	G	A	A	T	G	T	GA	0	2	1	1
W1884	367675A	450	1	61	2	1	0	0	3	0	2	0	0	0	0	9.5cm*5cm*2cm	71.0965	2011-06-07	2017-05-10	alive	A	GA	A	G	T	G	GT	G	0	2	1	3
W1892	367550A	451	1	63	1	2	0	0	2		2	0	0	0	0	1.6cm*1.5cm*0.5cm	71.1951	2011-06-02	2017-05-08	alive	AG	G	A	A	CT	GA	GT	G	0	2	1	1
W2356	388786A	552	1	67	1	2	1	1	4	3	3	1	1	0	0	1.5cm*1cm*0.8cm	71.2279	2011-12-07	2017-11-13	alive	A	G	A	AG	T	G	9	G	0	2	1	1
W2357	388972A	553	1	56	1	2	1	1	3	3	3	0	1	0	1	2cm*1.2cm*0.5cm	71.2279	2011-12-07	2017-11-13	alive	A	G	A	AG	CT	G	GT	G	0	1	1	2
W2343	388013A	550	2	62	1	2	0	1	4	0	3	0	1	0	1	1.7cm*1.4cm*0.7cm	71.2608	2011-12-01	2017-11-08	alive	A	G	A	G	C	A	G	G	0	2	1	2
W2354	389363A	786	1	45	1	1	0	0	3	0	2	0	1	0	0	3.2cm*2.5cm*0.8cm	71.2608	2011-12-06	2017-11-13	alive	A	GA	A	AG	T	GA	G	G	0	1		1
W2260	383869A	531	1	61	1	2	0	1	3	0	2	1	1	0	1	2.4cm*2cm*0.5cm	71.2936	2011-10-31	2017-10-09	alive	A	GA	GA	AG	T	GA	T	G	0	2	1	1
W2332	387632A	784	2	65	1	2	0	0	1	0	1	0	1	0	0	2.2cm*1.4cm*0.5cm	71.3265	2011-11-29	2017-11-08	alive	AG	GA	GA	A	T	GA	GT	G	0	2		2
W2036	374205A	480	1	66	1	2	1	0	2	3	3	0	0	0	0	2cm*1.5cm*1cm	71.3922	2011-07-26	2017-07-07	alive	A	GA	GA	A	CT	GA	GT	G	0	2	1	1
W2185	380803A	517	1	65	2	1	0	0	3	0	2	0	1	0	1	6cm*3cm*1cm	71.4579	2011-09-29	2017-09-12	alive	A	GA	A	AG	CT	G	T	G	0	2	1	3
W1935	369770A	462	2	24	2	2	0	0	1	0	1	0	0	0	1	5.5cm*4.5cm	71.4579	2011-06-23	2017-06-06	alive	A	A	A	AG	T	G	T	G	0	1	1	2
W1086	328971A	266	2	46	1	2	1	1	3	1	2	0	0	0	1	3.3*3*0.9	71.5236	2010-05-25	2016-05-10	lost to follow-up	A	G	A	A	T	A	G	GA	0	1	1	1
W2007	373056A	475	1	71	1	2	1	0	2	1	2	1	1	0	1	1cm*0.8cm*0.5cm	71.5565	2011-07-19	2017-07-05	alive	A	G	A	AG	T	GA	GT	G	0	2	1	1
W2021	373862A	477	2	42	2	2	0	0	1	1	1	0	0	0	1	5cm*4cm*0.5cm	71.5565	2011-07-21	2017-07-07	alive	A	G	GA	AG	T	G	T	G	0	1	1	1
W2243	382614A	528	2	75	2	2	1	0	3	2	3	0	0	0	0	9cm*7cm*0.2cm	71.6879	2011-10-19	2017-10-09	alive	A	G	GA	AG	CT	G	G	G	0	2	0	1
W0948	321452A	231	1	68	2	1	1	0	3	0	2	0	0	0	0	8*7*3	71.7207	2010-03-10	2016-03-01	death	A	GA	A	AG	T	GA	GT	G	1	2	0	3
W1915	368723A	456	2	58	1	2	1	0	1	0	1	0	0	0	1	2.5cm*2cm*0.3cm	71.7207	2011-06-15	2017-06-06	alive	AG	GA	A	AG	T	A	GT	GA	0	1	1	1
W1984	371919A	472	1	64	2	1	0	0	3	0	2	0	0	0	1	7.5cm*4cm*2cm	71.7864	2011-07-12	2017-07-05	alive	A	GA	A	AG	T	A	GT	G	0	2	1	1
W1993	371949A	473	2	65	2	1	1	1	3	1	2	0	0	0	1	6cm*4cm*1.5cm	71.7864	2011-07-12	2017-07-05	alive	A	G	A	AG	T	GA	GT	G	0	2	0	1
W1970	371785A	469	1	54	2	1	1	1	3	2	3	0	0	0	1	5cm*4.5cm*1.5cm	71.8193	2011-07-11	2017-07-05	alive	AG	A	A	AG	CT	GA	9	G	0	1	1	1
W2301	386270A	543	1	39	1	1	1	1	3	0	2	1	1	0	1	3cm*2.5cm*2cm	71.8193	2011-11-15	2017-11-09	alive	AG	GA	A	AG	T	GA	GT	GA	0	1	1	3
W2234	381983A	526	2	80	1	1	0	0	3	0	2	0	0	0	1	1.6cm*1.5cm*0.6cm	71.8522	2011-10-14	2017-10-09	alive	AG	GA	GA	AG	T	GA	T	GA	0	2	0	1
W1557	352867A	752	1	58	1	1	1	0	2	1	2	0	0	0	1	3*2*1.3	71.885	2011-01-20	2017-01-16	alive	AG	GA	A	AG	T	GA	GT	G	0	1		1
W2223	382263A	777	1	53	2	2	1	1	3	1	2	1	1	0	1	8cm*7cm*2cm	71.9179	2011-10-12	2017-10-09	alive	A	G	A	AG	T	GA	GT	G	0	1		1
W2170	379255A	513	1	53	1	2	0	0	1	0	1	0	1	0	0	3cm*2cm*1.5cm	71.9179	2011-09-15	2017-09-12	alive	A	G	A	AG	T	GA	T	G	0	1	1	1
W1812	364563A	437	2	80	2	1	0	0	2	1	2	0	0	0	1	5cm*4cm*0.9cm	71.9507	2011-05-10	2017-05-08	alive	A	GA	GA	A	T	GA	G	G	0	2	1	1
W2165	379041A	512	1	64	1	2	1	1	3	1	2	0	1	0	1	2.5cm*1.5cm*0.6cm	71.9507	2011-09-14	2017-09-12	alive	A	A	GA	A	CT	G	GT	G	0	2	1	1
W2163	379334A	510	1	62	1	2	1	0	2	1	2	0	0	0	1	2.8cm*2.2cm*0.5cm	71.9507	2011-09-14	2017-09-12	alive	A	GA	GA	A	T	GA	GT	G	0	2	0	1
W2164	379364A	511	2	56	1	1	0	0	1	0	1	0	0	0	0	0.8cm*0.6cm*0.2cm	71.9507	2011-09-14	2017-09-12	alive	A	GA	A	AG	T	GA	GT	G	0	1	0	1
W2293		539	1	62	1	2	1	0	4		3	0	1	0	1		71.9507	2011-11-10	2017-11-08	alive	AG	A	GA	AG	T	GA	T	GA	0	2	0	3
W2283	385532A	537	2	70	1	2	0	1	3	0	2	0	0	0	1	4cm*3.5cm*1.3cm	71.9836	2011-11-09	2017-11-08	alive	A	GA	A	AG	T	G	GT	G	0	2	0	1
W1977	371463A	470	1	62	1	2	1	1	3	1	2	1	1	0	1	2cm*1.5cm*0.6cm	71.9836	2011-07-06	2017-07-05	alive	AG	GA	A	A	T	G	GT	GA	0	2	0	1
W1963	370931A	466	1	69	1	1	1	0	3	2	3	0	0	0	0	4.5cm*3cm*0.5cm	72.0493	2011-07-04	2017-07-05	alive	AG	GA	GA	A	CT	GA	GT	GA	0	2	0	1
W1537	351794A	389	2	62	1	2	0	0	1	0	1	0	0	0	0	2.5*1.5*0.8	72.1478	2011-01-12	2017-01-16	alive	A	G	9	A	CT	9	T	G	0	2	1	1
W1792	363318A	433	1	71	1	1	0	0	1	1	1	0	0	0	0	1.5cm*1cm*1cm	72.345	2011-04-28	2017-05-08	alive	A	G	A	AG	CT	A	GT	G	0	2	0	1
W1389	344360A	349	1	77	1	2	1	1	2	0	1	0	0	0	0	4×3.5×0.5	72.345	2010-10-29	2016-11-08	alive	AG	G	A	A	T	G	T	GA	0	2		1
W1783	363316A	431	1	48	1	1	1	0	1	0	1	1	1	0	0	0.7cm*0.6cm*0.5cm	72.4107	2011-04-26	2017-05-08	alive	A	A	GA	AG	T	GA	GT	G	0	1	1	1
W1516	350954A	382	1	76	1	1	1	1	3	0	2	0	0	0	0	4.5×3×1.2	72.4107	2011-01-05	2017-01-17	alive	A	GA	A	AG	CT	G	T	G	0	2	1	1
W1508	350460A	379	2	82	1	2	0	1	3	2	3	0	0	0	1	4.5cm×3.5cm×1.0cm	72.6078	2010-12-29	2017-01-16	alive	A	GA	GA	A	T	GA	G	G	0	2	1	2
W1116	330684A	276	1	58	2	2	1	1	3	1	2	1	1	0	0	5x4x1	72.6078	2010-06-11	2016-06-29	alive	AG	GA	GA	A	CT	GA	GT	G	0	1	1	3
W2022	373246A	478	1	47	1	2	0	0	2	0	1	0	0	0	0	3.5cm*3cm*1cm	72.6407	2011-07-21	2017-08-09	alive	A	A	A	AG	CT	G	T	G	0	1	0	1
W2014	372906A	476	1	23	1	2	1	0	2	2	2	0	0	0	1	4.5cm*2cm	72.6735	2011-07-20	2017-08-09	alive	AG	A	A	AG	C	GA	9	G	0	1	1	1
W2218	382261A	522	1	65	2	2	1	1	2	2	2	0	1	0	1	6cm*3.5cm*1cm	72.9363	2011-10-11	2017-11-08	alive	A	G	A	AG	CT	GA	G	G	0	2	1	1
W1570	353437A	754	1	57	1	2	1	1	3	0	2	1	0	0	0	3.5*2.5*1.2	73.0678	2011-01-28	2017-03-01	alive	G	G	A	AG	T	A	G	A	0	1		2
W1958	370419A	770	2	50	1	1	0	0	1	0	1	1	1	0	0	2cm*1.5cm	73.3634	2011-06-29	2017-08-09	alive	A	GA	GA	AG	T	A	GT	G	0	1		1
W1776	362880A	430	1	65	1	1	1	1	3	2	3	0	0	0	1	4cm*3.5cm*2cm	73.3963	2011-04-25	2017-06-06	alive	A	A	A	AG	T	G	T	G	0	2	0	1
W0088	278655	68	1	74	2	2	0	0	3	2	3	0	0	0	0	6.5*6*1	73.4949	2008-10-09	2014-11-24	death	A	G	A	A	T	GA	G	G	1	2	1	1
W1520	351254A	384	2	72	1	2	1	0	1	1	1	0	0	0	1	2.5×1.5×0.8	73.7577	2011-01-07	2017-03-01	alive	AG	GA	GA	AG	T	GA	GT	G	0	2	1	2
W1518	351007A	383	1	59	2	1	0	0	3	2	3	1	1	0	1	8.5*7*2.5	73.8234	2011-01-05	2017-03-01	alive	A	G	A	AG	T	GA	GT	G	0	1	0	3
W0062	277465	64	2	68	1	2	0	0	3	2	3	0	0	1	1	4*2.5*1	74.2177	2008-09-17	2014-11-24	death	A	GA	A	AG	CT	G	T	G	1	2	0	1
W2037	373863A	481	1	50	2	2	0	0	3	0	2	1	1	0	0	10cm*9cm*2cm	74.4805	2011-07-26	2017-10-09	alive	A	A	GA	AG	CT	GA	GT	G	0	1	1	1
W0971	322392A	235	1	58	1	1	1	1	3	0	2	0	0	0	1	3.5*3*1	74.5133	2010-03-19	2016-06-03	alive	A	G	A	A	C	GA	GT	G	0	1	1	3
W2082	376095A	488	2	32	1	2	1	0	2	1	2	0	0	0	1	2.5cm*2.5cm*0.6cm	74.9076	2011-08-12	2017-11-08	alive	A	GA	G	A	CT	A	G	G	0	1	1	1
W2061	375925A	485	1	52	1	1	0	0	1	0	1	1	1	0	0	1.7cm*1.3cm*0.7cm	75.1704	2011-08-04	2017-11-08	alive	A	G	A	A	T	A	GT	G	0	1	0	1
W1093	329691A	269	1	64	1	2	1	0	3	1	2	0	0	0	0	4.5×3×0.8	75.2033	2010-06-01	2016-09-06	death	A	G	A	G	C	G	T	G	1	2	1	3
W0793	312123	205	1	60	2	2	0	0	2	0	1	0	1	0	0	8*2*0.3	75.4333	2009-11-17	2016-03-01	alive	AG	GA	A	AG	CT	G	T	G	0	2	0	1
W0004	274553	52	1	46	1	1	0	0	1	0	1	0	1	0	0	1.5*0.8*0.4	75.6304	2008-08-05	2014-11-24	alive	A	GA	A	G	T	GA	GT	G	0	1	1	1
W0733	309069	190	1	56	2	2	1	0	3	3	3	0	0	0	1	7*3*1.5	75.6961	2009-10-10	2016-01-31	death	AG	G	GA	AG	T	G	T	GA	1	1	1	1
W0762	310513	196	1	68	1	1	1	0	2	1	2	0	1	0	0	1.5*1.5*0.5	76.1232	2009-10-27	2016-03-01	death	AG	GA	GA	AG	T	9	9	G	1	2	1	1
W1102	329960A	272	1	64	1	1	0	0	1	0	1	1	1	0	0	2×1.5×0.5	76.386	2010-06-03	2016-10-14	death	A	G	A	AG	T	GA	GT	G	1	2	1	1
W0746	309884	193	1	70	1	2	1	0	1	0	1	0	0	0	0	3*3*0.4	76.4846	2009-10-16	2016-03-01	alive	A	GA	A	A	CT	A	G	G	0	2	1	1
W0052	277246	63	1	70	2	1	0	0	3	0	2	0	1	0	0	5.5*2*0.8	77.4374	2008-09-16	2015-03-01	death	A	GA	A	G	T	G	T	G	1	2	1	1
W1308	340382A	330	2	56	1	2	0	0	2	0	1	0	0	0	0	3×1.5×0.3	77.5359	2010-09-14	2017-03-01	alive	AG	GA	A	AG	T	GA	GT	GA	0	1	1	1
W1375	343690A	343	1	69	2	2	1	1	3	2	3	0	0	0	1	8×5×1	78.5216	2010-10-22	2017-05-08	alive	AG	A	A	AG	CT	GA	G	G	0	2	1	1
W0638	303795	165	1	73	1	2	1	0	2	1	2	0	0	0	0	4*3.5*1	78.8501	2009-08-05	2016-03-01	alive	AG	A	GA	AG	T	G	T	GA	0	2	1	1
W0627	303302	161	2	47	2	2	1	1	4	1	3	0	0	0	0	11*8*2	79.0472	2009-07-30	2016-03-01	death	A	G	A	G	CT	G	GT	G	1	1	0	1
W1427	346187A	364	1	56	1	1	1	1	3	2	3	1	1	0	1	2.5×2×0.7	79.5729	2010-11-17	2017-07-05	alive	A	A	A	G	T	GA	GT	G	0	1	1	1
W0600	301332	153	1	56	1	1	0	0	1	0	1	0	1	1	0	0.7	79.5729	2009-07-14	2016-03-01	alive	G	GA	GA	A	T	G	T	GA	0	1	1	1
W1404	345039A	354	2	52	1	1	0	0	1	0	1	0	0	1	0	2.5×1.5	80	2010-11-04	2017-07-05	alive	A	GA	A	A	T	GA	GT	G	0	1	0	1
W0552	300000	144	1	50	2	2	1	1	3	2	3	1	1	0	0	6*4*1	80.1643	2009-06-26	2016-03-01	alive	AG	G	A	AG	T	GA	GT	GA	0	1	1	2
W1382	343865A	346	2	63	1	1	1	0	2	0	1	0	1	0	1	0.8×0.5×0.4	80.3285	2010-10-25	2017-07-05	alive	A	G	GA	A	CT	GA	GT	G	0	2	0	1
W1381	343812A	345	1	56	1	2	1	1	2	1	2	1	1	0	1	1.5×1.2×1	80.3285	2010-10-25	2017-07-05	alive	A	G	A	A	T	GA	GT	G	0	1	1	1
W0528	298647	135	1	41	1	1	0	0	1	0	1	1	1	0	0	0.5	80.6571	2009-06-11	2016-03-01	alive	A	A	GA	AG	T	G	GT	G	0	1	1	1
W1011	325655A	241	2	72	1	2	0	0	3	1	2	0	0	0	1	2.5*2*1.5	80.9199	2010-04-21	2017-01-17	alive	AG	G	A	G	T	A	G	9	0	2	1	1
W0494	297119	129	1	69	1	1	1	0	3	1	2	0	0	1	0	3.5*3*0.8	81.1499	2009-05-27	2016-03-01	alive	A	GA	GA	A	T	A	G	G	0	2	1	1
W1001	324966A	238	1	63	1	2	0	0	2	0	1	0	1		0	2.3*1.3*0.8	81.1499	2010-04-13	2017-01-16	alive	AG	GA	GA	A	T	G	T	GA	0	2	1	1
W0478	296314	121	1	68	1	2	1	0	3	1	2	1	1	1	1	4.5*3*0.8	81.5113	2009-05-16	2016-03-01	alive	A	G	A	A	T	GA	GT	G	0	2	1	1
W1038	327104A	251	2	71	1	1	1	0	2	0	1	0	0	0	0	2.8*2.5*0.5	81.8727	2010-05-05	2017-03-01	alive	A	G	A	AG	T	GA	GT	G	0	2	1	1
W1276	339202A	324	1	40	2	1	1	0	3	2	3	0	0	0	1	6×4.6×0.3	82.0698	2010-09-02	2017-07-05	alive	AG	G	GA	A	T	9	T	9	0	1	1	1
W1273	338416A	323	2	48	1	2	1	1	3	0	2	0	0	0	1	3×2×1	82.1684	2010-08-30	2017-07-05	alive	A	G	A	G	T	G	GT	G	0	1	1	2
W0956	322167A	233	1	56	1	2	0	0	2	0	1	0	1	0	0	2*1.5*1	82.2341	2010-03-12	2017-01-17	alive	A	G	A	AG	T	G	T	G	0	1	1	3
W1257	338177A	319	1	58	2	1	1	0	3	1	2	0	0	0	0	8.5×8×1	82.3655	2010-08-24	2017-07-05	alive	A	A	GA	AG	T	G	T	G	0	1	1	1
W0423	292804	112	1	61	1	2	1	0	3	0	2	0	0	0	0	4*3.5*1.3	82.694	2009-04-10	2016-03-01	alive	A	GA	A	AG	T	G	T	G	0	2	0	1
W0994	324118A	237	1	68	1	1	1	0	3	0	2	0	1	0	1	3.5*2.5*1.5	82.7926	2010-04-07	2017-03-01	alive	A	GA	A	A	CT	GA	GT	G	0	2	0	1
W0612	302489	154	1	54	1	1	1	1	2	1	2	0	0	0	0	2*1.3*0.7	82.8255	2009-07-21	2016-06-15	alive	A	GA	GA	AG	T	A	G	G	0	1	1	1
W1290	339534A	326	1	53	2	2	1	1	3	1	2	1	1	0	1	7.5×5×1.5	83.0883	2010-09-06	2017-08-09	alive	A	GA	A	A	CT	G	T	G	0	1	1	1
W1148	332705A	287	1	57	2	1	1	0	1	2	2	0	1	1	0	9x6x1	83.154	2010-07-02	2017-06-06	alive	AG	A	A	A	T	GA	GT	GA	0	1	0	1
W1459	347861A	371	1	67	1	1	0	0	1	0	1	0	0	0	0	1.5×1×0.3	83.1869	2010-12-03	2017-11-08	alive	A	GA	GA	AG	T	GA	GT	G	0	2	0	1
W1208	335580A	305	1	78	2	1	1	0	3	1	2	0	0	0	1	5.5×4×1.5	83.2197	2010-07-29	2017-07-05	alive	9	G	A	AG	T	A	G	G	0	2	0	1
W1143	332351A	283	2	53	1	2	0	0	1	0	1	0	0	0	0	0.7x0.4x0.3	83.2526	2010-06-29	2017-06-06	alive	A	A	A	AG	CT	GA	GT	G	0	1	1	2
W1203	335455A	302	1	72	1	2	1	1	3	1	2	0	0	0	1	2.3×1.3×0.7	83.2526	2010-07-28	2017-07-05	alive	A	GA	GA	A	T	GA	GT	G	0	2	1	1
W1204	335454A	303	1	42	1	2	1	1	3	2	3	0	0	0	1	4×3×1	83.2526	2010-07-28	2017-07-05	alive	A	G	GA	AG	T	G	T	G	0	1	1	1
W1446	347478A	369	1	48	1	1	0	0	1	0	1	0	0	0	0	1.8×0.8×0.3	83.2854	2010-11-30	2017-11-08	alive	A	GA	A	G	CT	G	T	G	0	1	1	1
W1141	332074A	282	1	47	1	1	1	1	3	0	2	0	1	0	0	4.5x3.5x1	83.2854	2010-06-28	2017-06-06	alive	AG	GA	A	AG	T	A	G	G	0	1	1	3
W1139	331936A	281	1	53	1	2	1	0	2	2	2	0	0	1	0	2.5x2x1	83.384	2010-06-25	2017-06-06	alive	AG	GA	A	A	T	G	T	GA	0	1	1	1
W1088	329109A	267	2	65	1	2	0	0	1	1	1	0	0	1	0	3x2.5	83.4168	2010-05-26	2017-05-08	alive	AG	A	A	G	T	G	T	G	0	2	1	1
W1191	334689A	299	2	50	2	2	0	0	3	0	2	0	0	0	0	6×4.5×1.2	83.4825	2010-07-21	2017-07-05	alive	A	GA	G	A	T	GA	GT	G	0	1	1	1
W1080	328512A	264	1	54	1	2	0	0	1	0	1	1	0	0	0	2.5*2*1.5	83.614	2010-05-20	2017-05-08	alive	A	A	GA	A	CT	G	T	G	0	1	1	1
W1362	343199A	342	1	78	2	1	1	0	2	0	1	0	0	0	1	5×3.5×1	83.7125	2010-10-18	2017-10-09	alive	AG	GA	A	A	CT	GA	GT	GA	0	2	0	1
W1353	342924A	340	1	59	1	1	0	0	1	0	1	0	0	0	0	2.3×2×0.4	83.8439	2010-10-14	2017-10-09	alive	A	GA	A	G	CT	G	T	G	0	1	1	1
W1112	330697A	274	2	61	1	2	0	1	3	0	2	0	0		1	1.7*1.5*0.6	83.8439	2010-06-10	2017-06-05	alive	AG	GA	A	AG	T	G	GT	GA	0	2	1	3
W1162	332929A	291	1	53	1	2	0	0	1	0	1	0	0	0	0	4x3	83.9754	2010-07-06	2017-07-05	alive	A	G	GA	AG	T	G	T	G	0	1	1	2
W1153	332975A	289	2	76	2	2	0	0	3	0	2	0	0	0	1	11x6x2.5	83.9754	2010-07-06	2017-07-05	alive	AG	GA	A	A	T	A	G	G	0	2	0	1
W1097	329745A	270	1	51	1	1	1	0	3	2	3	1	1	0	0	4×3.5×0.8	84.1068	2010-06-02	2017-06-05	alive	A	A	GA	A	CT	GA	GT	G	0	1	0	1
W1151	332710A	288	1	53	1	2	1	0	1	1	1	0	0	1	1	2x1.8x0.4	84.1396	2010-07-01	2017-07-05	alive	A	A	A	AG	CT	GA	GT	G	0	1	1	1
W1402	344805A	745	1	55	2	2	1	1	3	1	2	1	1	0	0	5×3.5×1.3	84.1725	2010-11-03	2017-11-08	alive	A	G	A	A	T	GA	GT	9	0	1		1
W1401	344537A	352	1	59	2	2	0	1	3	0	2	0	0	0	0	6.7×6×1.2	84.1725	2010-11-03	2017-11-08	alive	A	G	GA	AG	T	G	T	G	0	1	1	1
W0912	319382A	225	1	45	1	1	0	0	1	0	1	0	0	0	0	4*3.5*1.5	84.6324	2010-02-10	2017-03-01	alive	AG	G	A	G	T	GA	GT	G	0	1	1	1
W1053	327798A	255	1	58	2	2	1	0	3	1	2	0			1	5*4*2	84.7639	2010-05-13	2017-06-05	alive	A	GA	GA	AG	CT	G	T	G	0	1	1	1
W0281	286994	89	1	57	2	2	0	0	3	1	2	0	1	0	1	5*3.8*3	84.7639	2009-02-06	2016-03-01	alive	AG	G	A	AG	T	G	9	GA	0	1	1	1
W0273	286473	87	2	75	2	2	1	0	3	0	2	1	1	0	0	10*9*3	84.8953	2009-02-02	2016-03-01	alive	A	GA	A	A	T	GA	GT	G	0	2	0	1
W0730	308594	189	2	71	2	2	1	0	3	0	2	0	0	0	0	7.5*6*1	85.1253	2009-09-28	2016-11-01	death	AG	GA	G	A	T	GA	GT	GA	1	2	1	1
W1012	325745A	242	1	52	1	2	1	1	3	1	2	1	0	1	1	4*3*1.2	85.4538	2010-04-22	2017-06-05	alive	A	GA	A	AG	T	GA	GT	G	0	1	1	1
W0982	323370A	236	1	54	2	2	0	0	3		2	1	1	0	1	5*4*1	86.2094	2010-03-30	2017-06-05	alive	A	GA	A	A	T	GA	GT	G	0	1	1	1
W0196	283249	80	1	61	1	2	0	1	3	0	2	0	0	0	0	4.5*3*1	86.6366	2008-12-11	2016-03-01	alive	A	G	A	G	T	A	T	G	0	2	1	1
W0199	283149	81	1	69	1	1	0	0	2	1	2	1	1	0	0	2.5*2*0.8	86.6694	2008-12-10	2016-03-01	alive	AG	G	A	AG	T	GA	GT	GA	0	2	0	1
W0957	321908A	234	1	74	1	1	1	0	3	0	2	1	1	0	0	3*2*1	86.8008	2010-03-12	2017-06-05	alive	A	G	GA	A	T	G	GT	G	0	2	1	1
W0814	313140	209	2	79	2	2	0	0	2	0	1	0	0	0	0	5*4*1.8	86.9651	2009-11-30	2017-02-28	alive	A	9	A	G	T	GA	GT	G	0	2	0	1
W1217	336453A	307	1	66	1	2	1	0	1	0	1	1	1	1	0	0.7×0.7×0.3	87.1622	2010-08-04	2017-11-08	alive	A	G	GA	A	T	G	T	G	0	2	1	1
W0773	311446	200	1	56	1	2	1	1	2	1	2	0	0	0	1	3*1.5*0.8	87.8193	2009-11-05	2017-03-01	alive	AG	G	A	A	CT	9	G	GA	0	1	1	3
W1115	330630A	275	1	54	2	2	0	0	3	0	2	1	1	0	1	7x7x1.5	88.9692	2010-06-10	2017-11-08	alive	A	A	A	A	T	G	T	G	0	1	1	1
W0950	321735A	232	1	46	1	1	1	1	2	1	2	0	0	0	0	2*1.5*1	88.9692	2010-03-11	2017-08-09	alive	AG	G	A	AG	CT	GA	GT	GA	0	1	1	1
W0076	277968	65	1	63	1	2	0	0	2	0	1	0	1	0	0	1.8*0.8*0.8	89.1663	2008-09-25	2016-03-01	alive	A	GA	GA	A	T	G	T	G	0	2	1	1
W0888	318058A	220	1	60	1	2	0	0	2	0	1	1	1	0	0	1.5*1.5*0.5	89.4292	2010-01-21	2017-07-05	alive	A	A	A	AG	T	GA	GT	9	0	2	0	1
W0022	276242	55	1	52	1	2	1	1	2	1	2	1	1	0	0	3*2.5*0.5	90.152	2008-08-26	2016-03-01	alive	A	G	GA	AG	CT	GA	GT	G	0	1	0	1
W0557	299898	146	2	53	1	1	1	0	3	0	2	0	0	0	0	3*2*0.8	90.6776	2009-06-24	2017-01-13	alive	A	GA	GA	A	CT	GA	GT	G	0	1	1	3
W0506	297843	130	2	44	1	2	0	1	3	0	2	0	0	0	1	3*2.5*0.3	91.4004	2009-06-02	2017-01-13	alive	A	G	A	G	T	G	GT	G	0	1	1	1
W0789	312124	204	1	64	1	2	1	1	3	1	2	0	0	0	1	4.5*3.5*1.5	91.5647	2009-11-17	2017-07-05	alive	A	G	GA	AG	T	GA	GT	G	0	2	1	3
W0465	295382	118	1	72	2	2	0	0	3	1	2	1	1	0	0	6*5*0.7	92.2218	2009-05-08	2017-01-13	alive	A	GA	GA	A	T	GA	GT	G	0	2	1	1
W0587	301340	152	1	58	1	1	0	0	2	0	1	1	1	1	0	3*2.8*0.9	92.9774	2009-07-08	2017-04-07	alive	AG	A	A	A	T	GA	9	GA	0	1	1	1
W0383	291456	103	1	64	2	2	1	0	3	0	2	0	1	0	0	6.5*5.5*1	93.6345	2009-03-26	2017-01-13	alive	A	GA	A	A	CT	G	T	G	0	2	1	1
W0684	305678	180	1	60	2	2	1	0	3	1	2	0	0	0	0	5.2*3*1.5	94.2587	2009-08-27	2017-07-05	alive	A	GA	A	A	T	G	T	G	0	2	0	1
W0678	305503	178	1	81	1	1	0	1	3	0	2	0	0	0	0	4*3*0.5	94.3244	2009-08-25	2017-07-05	alive	A	G	GA	AG	T	G	GT	G	0	2	1	1
W0321	288530	93	2	70	2	1	0	0	3	2	3	0	0	0	0		94.6201	2009-02-24	2017-01-13	alive	A	G	A	A	C	GA	GT	G	0	2	0	1
W0669	304637	174	1	62	1	1	0	0	2	1	2	0	0	0	1	4.5*3.5*1.5	94.6858	2009-08-14	2017-07-05	alive	A	GA	A	A	T	GA	GT	G	0	2	1	1
W0298	288050	90	1	63	1	1	1	1	3	1	2	0	1	0	1	3*2*1.5	94.8172	2009-02-18	2017-01-13	alive	A	G	A	A	T	A	GT	G	0	2	1	1
W0657	304164	171	1	63	2	1	0	0	3	1	2	1	1	0	0	5*4*1.5	94.8172	2009-08-10	2017-07-05	alive	A	GA	GA	A	T	GA	GT	G	0	2	1	1
W0516	298138	131	1	52	1	1	0	1	3	1	2	0	1	0	1	2.5*1.5*0.5	95.0472	2009-06-06	2017-05-08	alive	A	G	GA	A	T	GA	GT	G	0	1	1	1
W0623	303049	159	1	62	1	1	1	0	2	0	1	0	1	0	1	2.5*2*1.5	95.3758	2009-07-24	2017-07-05	alive	A	A	A	AG	T	GA	GT	G	0	2	0	3
W0551	299999	143	2	36	1	2	1	1	1	0	1	0	0	0	1	1.6*1.3*0.5	95.4086	2009-06-23	2017-06-05	alive	A	G	GA	A	C	A	G	G	0	1	1	1
W0584	301064	151	2	75	1	2	1	0	1	0	1	0	0	1	1	1.1	95.9343	2009-07-07	2017-07-05	alive	A	GA	GA	AG	T	A	G	G	0	2	1	1
W0629	303050	162	2	48	1	2	1	1	3	0	2	1	0	1	1	3*2.5*0.8	96.3943	2009-07-28	2017-08-09	alive	A	G	GA	AG	T	GA	GT	G	0	1	1	1
W0108	279406	70	2	64	1	1	0	1	3	2	3	0	1	0	0	4.5*4*1.5	96.6242	2008-10-20	2016-11-08	alive	A	A	GA	AG	T	G	T	G	0	2	0	3
W0750	309768	194	1	62	1	2	0	0	1	1	1	1	1	0	1	4*3*1.2	96.6571	2009-10-19	2017-11-08	alive	A	A	GA	A	T	GA	GT	G	0	2	1	1
W0744	309886	192	2	60	1	2	1	0	1	1	1	0	0	0	0	2*1*0.5	96.7556	2009-10-16	2017-11-08	alive	A	G	A	A	T	A	G	G	0	2	1	1
W0705	306996	185	1	48	1	1	0	1	3	0	2	1	1	0	1	3.5*3*1	96.9856	2009-09-09	2017-10-09	alive	AG	GA	A	AG	T	G	GT	GA	0	1	0	1
W0728	308483	188	1	72	2	2	1	0	3	2	3	0	0	0	1	8*5*1	97.3799	2009-09-27	2017-11-08	alive	A	GA	GA	AG	T	G	GT	G	0	2	1	1
W0441	294380	114	1	56	1	2	0	0	2	0	1	0	0	0	0	2.3*2*0.5	98.2669	2009-04-27	2017-07-05	alive	A	GA	A	A	CT	GA	GT	G	0	1	1	1
W0395	291569	106	1	38	1	2	1	1	2	1	2	0	0	0	1	3.5*2.5*0.8	98.3326	2009-03-26	2017-06-05	alive	A	A	GA	A	T	GA	GT	G	0	1	0	1
W0304	287765	91	1	65	2	2	0	0	3	1	2	1	1	0	1	5*4*1.5	98.6612	2009-02-16	2017-05-08	alive	AG	A	A	AG	CT	A	G	G	0	2	0	1
W0419	292688	111	1	53	2	1	1	0	3	1	2	1	1	0	1	7*5.5*0.8	98.8583	2009-04-09	2017-07-05	alive	AG	GA	A	G	CT	G	T	G	0	1	0	1
W0457	295154	115	2	71	1	2	0	1	3	0	2	0	0	0	0	4*2.5*0.6	99.1211	2009-05-06	2017-08-09	alive	AG	G	A	A	T	G	T	G	0	2	0	1
W0353	290358	97	1	73	1	2	1	1	3	1	2	1	0	0	1	2*1	99.6468	2009-03-16	2017-07-05	alive	A	GA	GA	AG	T	GA	GT	G	0	2	1	1
W0417	292435	110	1	41	2	2	1	1	3	2	3	1	0	0	1	5.5*5*0.8	100.074	2009-04-07	2017-08-09	alive	A	GA	A	AG	CT	GA	GT	G	0	1	0	1
W0214	283796	82	1	57	1	1	0	0	2	0	1	0	1	0	0	3*2.5*0.8	100.632	2008-12-18	2017-05-08	alive	A	GA	A	AG	T	G	T	G	0	1	0	1
W0541	299245	139	1	73	1	2	1	0	2	2	2	1	1	0	1	2*1.5*0.8	100.698	2009-06-18	2017-11-08	alive	AG	GA	G	A	T	GA	GT	GA	0	2	1	3
W0529	298849	136	2	53	1	2	0	1	3	0	2	0	0	0	1	3.5*2*0.5	100.797	2009-06-15	2017-11-08	alive	A	GA	GA	A	T	GA	GT	G	0	1	1	1
W0276	286588	88	1	66	1	2	1	0	3	2	3	1	1	0	1	2.5*2.5*0.8	105.133	2009-02-03	2017-11-08	alive	AG	GA	G	A	T	GA	GT	GA	0	2	0	1
W0235	284564	83	1	53	1	1	0	0	1	0	1	1	1	0	0	2.5*2*0.5	106.415	2008-12-26	2017-11-08	alive	A	A	A	A	T	GA	GT	G	0	1	1	1
W0184	282729	79	2	76	2	2	1	0	3	0	2	0	0	0	0	5.5*4.5*1.5	107.138	2008-12-04	2017-11-08	alive	AG	GA	GA	A	CT	GA	GT	G	0	2	1	1
W0087	278644	67	2	68	2	1	0	0	3	1	2	0	1	1	1	6.2*6*1.8	108.977	2008-10-09	2017-11-08	alive	A	G	A	AG	T	GA	GT	G	0	2	0	1
