# Supplementary material for: Long non-coding RNA polymorphisms on 8q24 are associated with the prognosis of gastric cancer in a Chinese population
Source: PeerJ. 2020 Feb 21;8:e8600. doi: 10.7717/peerj.8600 (PMC7039120; doi:10.7717/peerj.8600)
Supplement: Supplemental Information 2 [file peerj-08-8600-s002.xlsx]

## Sheet: Sheet1
Variables	Codes
gender	1=male; 2=female
tumorSizeGroup	1=tumor size <5cm; 2=tumor size>=5cm
HistologicalGrade	1=Low-grade; 2=High-grade
LymphvascularInvasion	0=No; 1=Yes
NeuralInvasion	0=No; 1=Yes
Tstage	1=T1; 2=T2; 3=T3;4=T4
Nstage	0=N0; 1=N1; 2=N2; 3=N3
TNMstage	1=I stage; 2=II stage; 3=III stage
drinking	0=No; 1=Yes
smoking	0=No; 1=Yes
FamilyHistory	0=No; 1=Yes
Chemotherapy	0=No; 1=Yes
STATUS	0=alive or lost to follow-up; 1=died
agegroup	1=<60 year old; 2>=60 year old
HP	0=Negative; 1=Positive
HistologicalType	1=Tubular; 2=Signet-ring cell ; 3=Other
